# Supplementary material for: 1,4-Bis(imidazole)butane ligand and strontium(ii) directed 1-D chains based on basket-type molybdophosphates and transition metal (TM) linkers
Source: Royal Society of Chemistry journal article supplement (doi:10.1039/c5ce00820d), 2015-01-01
Supplement: c5ce00820d1.pdf [file c5ce00820d1.pdf]

## Support Information

# 1,4-Bis(imidazole)butane Ligand and Strontium(II) Directed 1-D chains Based on Basket-type Molybdophosphates and Transition Metal (TM) Linkers

He Zhang,<sup>a,b</sup> Jing-hua Lv,<sup>a</sup> Kai Yu,<sup>\*a,b</sup> Chun-mei Wang,<sup>a,b</sup> Chun-xiao Wang,<sup>a,b</sup> Lu Wang,<sup>c</sup> Bai-Bin Zhou<sup>\*a,b</sup>

### 1. Structural figures

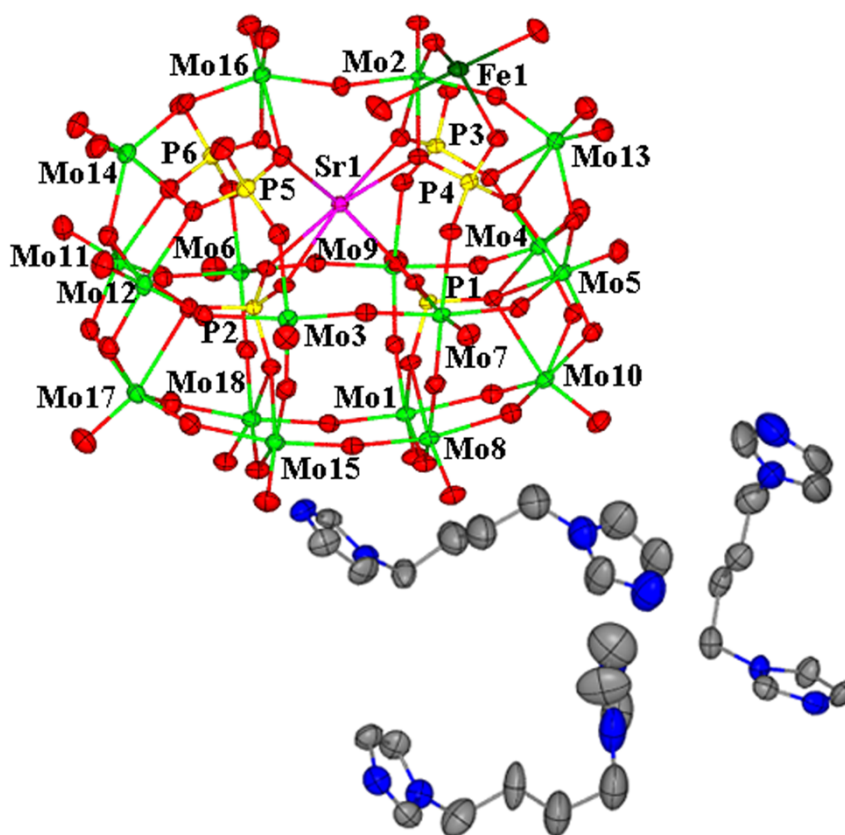

**Figure S1** ORTEP view of the basic units in compound **1** with 50% thermal ellipsoid.

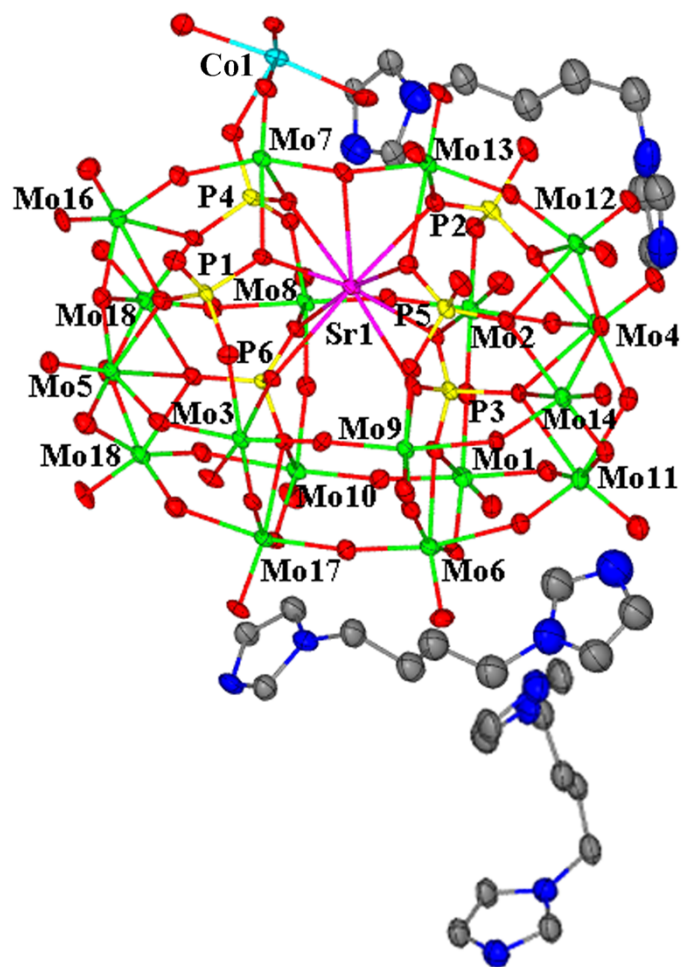

**Figure S2** ORTEP view of the basic units in compound **2** with 50% thermal ellipsoid.

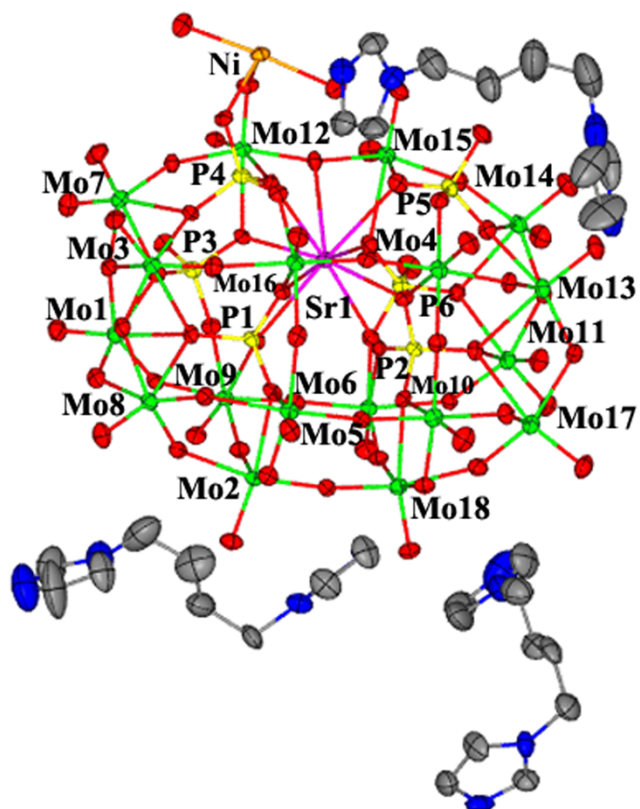

**Figure S3** ORTEP view of the basic units in compound **3** with 50% thermal ellipsoid.

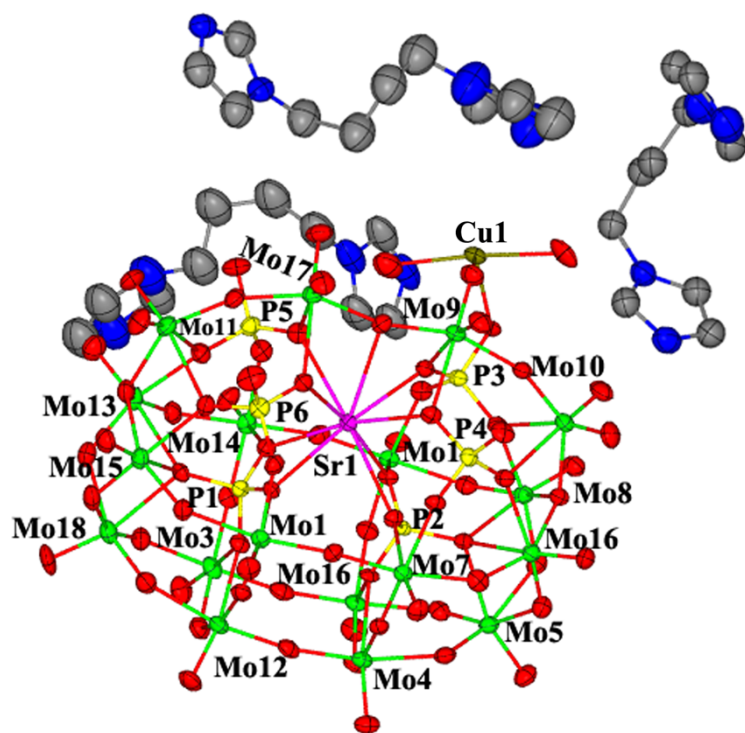

**Figure S4** ORTEP view of the basic units in compound **4** with 50% thermal ellipsoid.

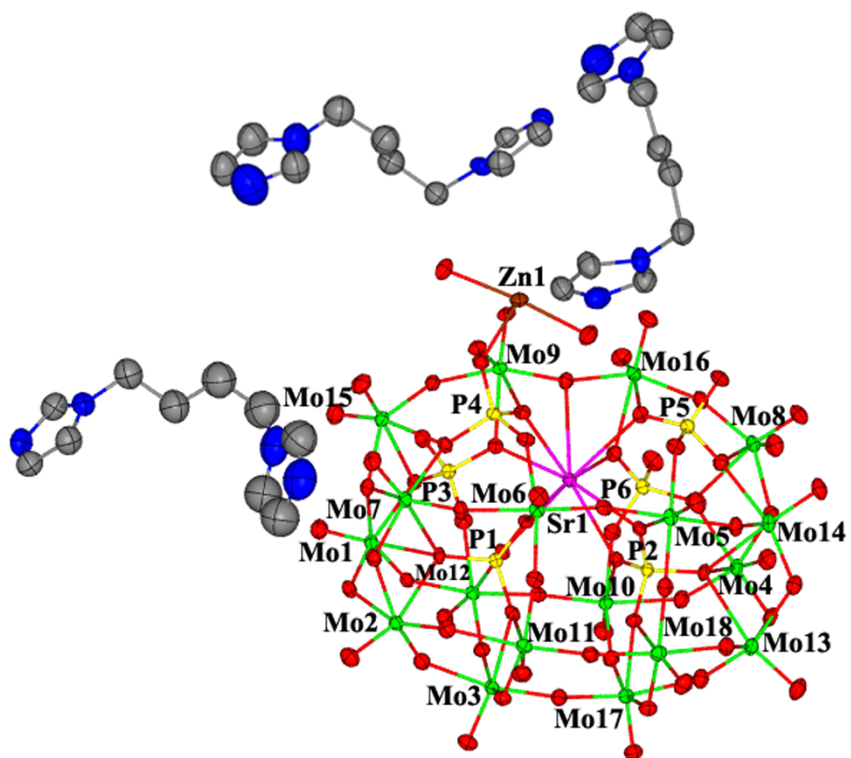

**Figure S5** ORTEP view of the basic units in compound **5** with 50% thermal ellipsoid.

## 2. Structural data

**Table S1** Selected bond lengths (Å) and bond angles (°) of compound **1**

|                   |          |                   |          |                   |          |
|-------------------|----------|-------------------|----------|-------------------|----------|
| Mo(1)-O(35)       | 1.671(8) | Mo(1)-O(34)       | 1.867(7) | Mo(1)-O(23)       | 1.872(7) |
| Mo(1)-O(74)       | 1.954(7) | Mo(1)-O(28)       | 2.083(7) | Mo(1)-O(20)       | 2.287(7) |
| Mo(2)-O(11)       | 1.667(7) | Mo(2)-O(50)       | 1.873(7) | Mo(2)-O(34)       | 1.895(7) |
| Mo(2)-O(40)       | 2.017(7) | Mo(2)-O(72)       | 2.062(7) | Mo(2)-O(42)       | 2.220(7) |
| Mo(3)-O(26)       | 1.675(7) | Mo(3)-O(31)       | 1.876(7) | Mo(3)-O(39)       | 1.878(7) |
| Mo(3)-O(10)       | 2.023(8) | Mo(3)-O(69)       | 2.068(7) | Mo(3)-O(16)       | 2.206(7) |
| Mo(4)-O(15)       | 1.675(7) | Mo(4)-O(64)       | 1.784(8) | Mo(4)-O(40)       | 1.792(7) |
| Mo(4)-O(75)       | 2.051(7) | Mo(4)-O(46)       | 2.146(7) | Mo(4)-O(63)       | 2.385(7) |
| Mo(5)-O(24)       | 1.656(8) | Mo(5)-O(10)       | 1.782(8) | Mo(5)-O(70)       | 1.814(7) |
| Mo(5)-O(61)       | 2.062(7) | Mo(5)-O(22)       | 2.123(7) | Mo(5)-O(29)       | 2.429(7) |
| Mo(6)-O(55)       | 1.665(7) | Mo(6)-O(65)       | 1.887(7) | Mo(6)-O(74)       | 1.939(7) |
| Mo(6)-O(32)       | 2.090(7) | Mo(6)-O(20)       | 2.281(7) | Mo(6)-O(9)        | 1.887(7) |
| Mo(7)-O(73)       | 1.716(7) | Mo(7)-O(52)#1     | 1.723(7) | Mo(7)-O(14)       | 1.853(7) |
| Mo(7)-O(17)       | 1.980(7) | Mo(7)-O(58)       | 2.197(7) | Mo(7)-O(53)       | 2.214(7) |
| Mo(8)-O(21)       | 1.681(7) | Mo(8)-O(50)       | 1.857(7) | Mo(8)-O(47)       | 1.876(7) |
| Mo(8)-O(36)       | 2.013(7) | Mo(8)-O(18)       | 2.049(7) | Mo(8)-O(19)       | 2.222(7) |
| Mo(9)-O(37)       | 1.678(7) | Mo(9)-O(39)       | 1.852(7) | Mo(9)-O(65)       | 1.869(7) |
| Mo(9)-O(30)       | 2.009(7) | Mo(9)-O(51)       | 2.020(7) | Mo(9)-O(43)       | 2.237(7) |
| Mo(10)-O(4)       | 1.663(7) | Mo(10)-O(23)      | 1.867(7) | Mo(10)-O(54)      | 1.894(7) |
| Mo(10)-O(47)      | 1.898(7) | Mo(10)-O(41)      | 2.118(8) | Mo(10)-O(27)      | 2.295(7) |
| Mo(11)-O(57)      | 1.674(8) | Mo(11)-O(32)      | 1.787(7) | Mo(11)-O(28)      | 1.788(7) |
| Mo(11)-O(64)      | 2.078(7) | Mo(11)-O(67)      | 2.104(7) | Mo(11)-O(63)      | 2.407(7) |
| Mo(12)-O(68)      | 1.694(7) | Mo(12)-O(59)      | 1.699(7) | Mo(12)-O(1)       | 1.830(7) |
| Mo(12)-O(75)      | 2.047(7) | Mo(12)-O(66)      | 2.351(7) | Mo(12)-O(46)      | 2.377(7) |
| Mo(13)-O(48)      | 1.685(7) | Mo(13)-O(49)      | 1.701(7) | Mo(13)-O(14)      | 1.948(7) |
| Mo(13)-O(1)       | 1.950(7) | Mo(13)-O(56)      | 2.294(7) | Mo(13)-O(33)      | 2.299(7) |
| Mo(14)-O(45)      | 1.680(7) | Mo(14)-O(67)      | 1.780(8) | Mo(14)-O(30)      | 1.793(7) |
| Mo(14)-O(75)      | 2.041(7) | Mo(14)-O(66)      | 2.125(7) | Mo(14)-O(63)      | 2.438(7) |
| Mo(15)-O(6)       | 1.690(7) | Mo(15)-O(62)      | 1.789(8) | Mo(15)-O(41)      | 1.796(7) |
| Mo(15)-O(70)      | 2.059(8) | Mo(15)-O(60)      | 2.073(8) | Mo(15)-O(29)      | 2.376(7) |
| Mo(16)-O(71)      | 1.700(8) | Mo(16)-O(8)       | 1.703(8) | Mo(16)-O(17)      | 1.815(7) |
| Mo(16)-O(61)      | 2.034(7) | Mo(16)-O(38)      | 2.352(7) | Mo(16)-O(22)      | 2.377(7) |
| Mo(17)-O(7)       | 1.683(7) | Mo(17)-O(31)      | 1.885(7) | Mo(17)-O(54)      | 1.925(7) |
| Mo(17)-O(62)      | 2.116(8) | Mo(17)-O(27)      | 2.296(7) | Mo(17)-O(9)       | 1.857(7) |
| Mo(18)-O(12)      | 1.682(7) | Mo(18)-O(18)      | 1.775(7) | Mo(18)-O(60)      | 1.822(7) |
| Mo(18)-O(61)      | 2.049(7) | Mo(18)-O(38)      | 2.109(7) | Mo(18)-O(29)      | 2.426(7) |
| P(1)-O(44)        | 1.508(7) | P(2)-O(33)        | 1.505(7) | P(3)-O(43)        | 1.510(7) |
| P(1)-O(69)        | 1.523(7) | P(2)-O(72)        | 1.527(7) | P(3)-O(42)        | 1.529(7) |
| P(1)-O(53)        | 1.562(7) | P(2)-O(46)        | 1.529(7) | P(3)-O(20)        | 1.541(7) |
| P(1)-O(22)        | 1.568(7) | P(2)-O(5)         | 1.564(8) | P(3)-O(63)        | 1.554(7) |
| P(4)-O(25)        | 1.512(7) | P(5)-O(56)        | 1.514(7) | P(6)-O(19)        | 1.508(7) |
| P(4)-O(58)        | 1.534(7) | P(5)-O(51)        | 1.531(7) | P(6)-O(27)        | 1.510(7) |
| P(4)-O(36)        | 1.531(7) | P(5)-O(2)         | 1.547(8) | P(6)-O(16)        | 1.518(7) |
| P(4)-O(38)        | 1.571(7) | P(5)-O(66)        | 1.556(8) | P(6)-O(29)        | 1.567(8) |
| Sr(1)-O(53)       | 2.505(7) | Sr(1)-O(58)       | 2.522(7) | Sr(1)-O(56)       | 2.589(7) |
| Sr(1)-O(42)       | 2.622(7) | Sr(1)-O(33)       | 2.623(7) | Sr(1)-O(43)       | 2.637(7) |
| Sr(1)-O(19)       | 2.654(7) | Sr(1)-O(16)       | 2.663(7) | Sr(1)-O(14)       | 2.840(7) |
| Fe(1)-O(44)#2     | 2.033(7) | Fe(1)-O(25)       | 2.059(7) | Fe(1)-O(52)       | 2.099(7) |
| Fe(1)-O(73)       | 2.119(7) | Fe(1)-O(13)       | 2.151(8) | Fe(1)-O(3)        | 2.201(8) |
| O(35)-Mo(1)-O(34) | 101.7(4) | O(11)-Mo(2)-O(50) | 98.9(3)  | O(26)-Mo(3)-O(31) | 101.1(3) |
| O(35)-Mo(1)-O(23) | 100.3(3) | O(11)-Mo(2)-O(34) | 101.6(3) | O(26)-Mo(3)-O(39) | 97.4(3)  |
| O(35)-Mo(1)-O(74) | 100.0(3) | O(11)-Mo(2)-O(40) | 94.1(3)  | O(26)-Mo(3)-O(10) | 94.3(3)  |

|                     |          |                     |          |                     |          |
|---------------------|----------|---------------------|----------|---------------------|----------|
| O(35)-Mo(1)-O(28)   | 93.1(3)  | O(11)-Mo(2)-O(72)   | 95.1(3)  | O(26)-Mo(3)-O(69)   | 95.4(3)  |
| O(35)-Mo(1)-O(20)   | 168.9(3) | O(11)-Mo(2)-O(42)   | 173.1(3) | O(26)-Mo(3)-O(16)   | 172.6(3) |
| O(15)-Mo(4)-O(64)   | 102.0(4) | O(24)-Mo(5)-O(10)   | 105.5(4) | O(55)-Mo(6)-O(65)   | 101.0(3) |
| O(15)-Mo(4)-O(40)   | 104.1(3) | O(24)-Mo(5)-O(70)   | 102.3(3) | O(55)-Mo(6)-O(9)    | 101.4(3) |
| O(15)-Mo(4)-O(75)   | 97.8(3)  | O(24)-Mo(5)-O(61)   | 99.4(3)  | O(55)-Mo(6)-O(74)   | 100.7(3) |
| O(15)-Mo(4)-O(46)   | 96.8(3)  | O(24)-Mo(5)-O(22)   | 96.2(3)  | O(55)-Mo(6)-O(32)   | 91.3(3)  |
| O(15)-Mo(4)-O(63)   | 170.1(3) | O(24)-Mo(5)-O(29)   | 170.5(3) | O(55)-Mo(6)-O(20)   | 167.2(3) |
| O(73)-Mo(7)-O(52)#1 | 104.3(3) | O(21)-Mo(8)-O(50)   | 100.9(3) | O(37)-Mo(9)-O(39)   | 98.3(3)  |
| O(73)-Mo(7)-O(14)   | 99.7(3)  | O(21)-Mo(8)-O(47)   | 99.5(3)  | O(37)-Mo(9)-O(65)   | 101.1(3) |
| O(73)-Mo(7)-O(17)   | 94.9(3)  | O(21)-Mo(8)-O(36)   | 97.5(3)  | O(37)-Mo(9)-O(30)   | 94.5(3)  |
| O(73)-Mo(7)-O(58)   | 90.6(3)  | O(21)-Mo(8)-O(18)   | 91.4(3)  | O(37)-Mo(9)-O(51)   | 96.2(3)  |
| O(73)-Mo(7)-O(53)   | 166.0(3) | O(21)-Mo(8)-O(19)   | 172.6(3) | O(37)-Mo(9)-O(43)   | 173.4(3) |
| O(4)-Mo(10)-O(23)   | 100.5(4) | O(57)-Mo(11)-O(32)  | 105.1(4) | O(68)-Mo(12)-O(59)  | 103.4(4) |
| O(4)-Mo(10)-O(54)   | 102.2(3) | O(57)-Mo(11)-O(28)  | 104.0(4) | O(68)-Mo(12)-O(1)   | 106.1(4) |
| O(4)-Mo(10)-O(47)   | 99.9(3)  | O(57)-Mo(11)-O(64)  | 97.5(3)  | O(68)-Mo(12)-O(75)  | 96.9(3)  |
| O(4)-Mo(10)-O(41)   | 92.8(3)  | O(57)-Mo(11)-O(67)  | 96.5(3)  | O(68)-Mo(12)-O(66)  | 163.2(3) |
| O(4)-Mo(10)-O(27)   | 169.4(3) | O(57)-Mo(11)-O(63)  | 164.0(3) | O(68)-Mo(12)-O(46)  | 84.8(3)  |
| O(48)-Mo(13)-O(49)  | 103.3(4) | O(45)-Mo(14)-O(67)  | 101.6(4) | O(6)-Mo(15)-O(62)   | 105.0(3) |
| O(48)-Mo(13)-O(14)  | 98.5(3)  | O(45)-Mo(14)-O(30)  | 105.2(3) | O(6)-Mo(15)-O(41)   | 105.5(3) |
| O(48)-Mo(13)-O(1)   | 100.3(3) | O(45)-Mo(14)-O(75)  | 99.2(3)  | O(6)-Mo(15)-O(70)   | 94.2(3)  |
| O(48)-Mo(13)-O(56)  | 168.4(3) | O(45)-Mo(14)-O(66)  | 97.4(3)  | O(6)-Mo(15)-O(60)   | 93.5(3)  |
| O(48)-Mo(13)-O(33)  | 90.7(3)  | O(45)-Mo(14)-O(63)  | 170.4(3) | O(6)-Mo(15)-O(29)   | 161.5(3) |
| O(71)-Mo(16)-O(8)   | 102.9(4) | O(7)-Mo(17)-O(9)    | 100.0(3) | O(12)-Mo(18)-O(18)  | 105.0(3) |
| O(71)-Mo(16)-O(17)  | 103.6(3) | O(7)-Mo(17)-O(31)   | 100.9(3) | O(12)-Mo(18)-O(60)  | 101.4(3) |
| O(71)-Mo(16)-O(61)  | 101.0(3) | O(7)-Mo(17)-O(54)   | 101.6(3) | O(12)-Mo(18)-O(61)  | 98.7(3)  |
| O(71)-Mo(16)-O(38)  | 167.8(3) | O(7)-Mo(17)-O(62)   | 92.1(3)  | O(12)-Mo(18)-O(38)  | 97.7(3)  |
| O(71)-Mo(16)-O(22)  | 85.7(3)  | O(7)-Mo(17)-O(27)   | 168.6(3) | O(12)-Mo(18)-O(29)  | 170.2(3) |
| O(44)-P(1)-O(69)    | 109.1(4) | O(44)-P(1)-O(53)    | 111.4(4) | O(44)-P(1)-O(22)    | 111.0(4) |
| O(33)-P(2)-O(72)    | 111.2(4) | O(33)-P(2)-O(46)    | 110.3(4) | O(33)-P(2)-O(5)     | 110.2(4) |
| O(43)-P(3)-O(42)    | 108.4(4) | O(43)-P(3)-O(20)    | 110.5(4) | O(43)-P(3)-O(63)    | 110.0(4) |
| O(25)-P(4)-O(58)    | 110.5(4) | O(25)-P(4)-O(36)    | 110.4(4) | O(25)-P(4)-O(38)    | 108.6(4) |
| O(56)-P(5)-O(51)    | 110.7(4) | O(56)-P(5)-O(2)     | 111.7(4) | O(56)-P(5)-O(66)    | 108.3(4) |
| O(19)-P(6)-O(27)    | 111.4(4) | O(19)-P(6)-O(16)    | 108.1(4) | O(19)-P(6)-O(29)    | 110.1(4) |
| O(53)-Sr(1)-O(58)   | 64.9(2)  | O(53)-Sr(1)-O(56)   | 81.1(2)  | O(53)-Sr(1)-O(42)   | 171.0(2) |
| O(53)-Sr(1)-O(33)   | 114.5(2) | O(53)-Sr(1)-O(43)   | 119.5(2) | O(53)-Sr(1)-O(19)   | 100.9(2) |
| O(53)-Sr(1)-O(16)   | 72.1(2)  | O(53)-Sr(1)-O(14)   | 57.4(2)  |                     |          |
| O(44)#2-Fe(1)-O(25) | 176.1(3) | O(44)#2-Fe(1)-O(52) | 90.4(3)  | O(44)#2-Fe(1)-O(73) | 91.8(3)  |
| O(44)#2-Fe(1)-O(13) | 86.0(3)  | O(44)#2-Fe(1)-O(3)  | 97.9(3)  |                     |          |

Symmetry transformations used to generate equivalent atoms: #1 -x,-y,-z; #2 -x+1/2,-y+1/2,-z

**Table S2** Selected bond lengths (Å) and bond angles (°) of compound **2**

|             |          |             |          |             |          |
|-------------|----------|-------------|----------|-------------|----------|
| Mo(1)-O(60) | 1.726(5) | Mo(2)-O(14) | 1.769(5) | Mo(3)-O(69) | 1.717(5) |
| Mo(1)-O(4)  | 1.927(5) | Mo(2)-O(39) | 1.770(5) | Mo(3)-O(9)  | 1.935(5) |
| Mo(1)-O(45) | 1.937(5) | Mo(2)-O(1)  | 1.926(5) | Mo(3)-O(5)  | 1.935(6) |
| Mo(1)-O(13) | 1.983(5) | Mo(2)-O(30) | 2.026(5) | Mo(3)-O(51) | 2.087(5) |
| Mo(1)-O(56) | 2.175(5) | Mo(2)-O(11) | 2.262(5) | Mo(3)-O(57) | 2.120(5) |
| Mo(1)-O(25) | 2.344(5) | Mo(2)-O(22) | 2.264(5) | Mo(3)-O(16) | 2.281(5) |
| Mo(4)-O(49) | 1.727(5) | Mo(5)-O(27) | 1.730(5) | Mo(6)-O(50) | 1.728(5) |
| Mo(4)-O(17) | 1.833(5) | Mo(5)-O(18) | 1.823(5) | Mo(6)-O(12) | 1.916(5) |
| Mo(4)-O(31) | 1.859(5) | Mo(5)-O(19) | 1.852(5) | Mo(6)-O(34) | 1.927(5) |
| Mo(4)-O(47) | 2.114(5) | Mo(5)-O(47) | 2.122(5) | Mo(6)-O(28) | 2.091(5) |
| Mo(4)-O(41) | 2.180(5) | Mo(5)-O(63) | 2.161(5) | Mo(6)-O(32) | 2.101(5) |
| Mo(4)-O(33) | 2.505(5) | Mo(5)-O(33) | 2.483(5) | Mo(6)-O(3)  | 2.294(5) |
| Mo(7)-O(65) | 1.729(5) | Mo(8)-O(58) | 1.720(5) | Mo(9)-O(24) | 1.726(5) |
| Mo(7)-O(9)  | 1.913(5) | Mo(8)-O(2)  | 1.918(5) | Mo(9)-O(45) | 1.925(5) |
| Mo(7)-O(29) | 1.924(5) | Mo(8)-O(29) | 1.949(5) | Mo(9)-O(12) | 1.932(5) |

|                    |          |                    |          |                    |          |
|--------------------|----------|--------------------|----------|--------------------|----------|
| Mo(7)-O(8)         | 2.082(5) | Mo(8)-O(13)        | 1.955(5) | Mo(9)-O(17)        | 2.089(5) |
| Mo(7)-O(18)        | 2.113(5) | Mo(8)-O(53)        | 2.189(5) | Mo(9)-O(37)        | 2.117(5) |
| Mo(7)-O(20)        | 2.277(5) | Mo(8)-O(25)        | 2.360(5) | Mo(9)-O(38)        | 2.271(5) |
| Mo(10)-O(54)       | 1.735(5) | Mo(11)-O(48)       | 1.734(6) | Mo(12)-O(67)       | 1.733(6) |
| Mo(10)-O(53)       | 1.837(5) | Mo(11)-O(32)       | 1.830(5) | Mo(12)-O(51)       | 1.833(5) |
| Mo(10)-O(56)       | 1.838(5) | Mo(11)-O(55)       | 1.848(5) | Mo(12)-O(62)       | 1.859(6) |
| Mo(10)-O(31)       | 2.134(5) | Mo(11)-O(43)       | 2.110(5) | Mo(12)-O(43)       | 2.106(5) |
| Mo(10)-O(19)       | 2.144(5) | Mo(11)-O(40)       | 2.195(5) | Mo(12)-O(61)       | 2.189(5) |
| Mo(10)-O(33)       | 2.435(5) | Mo(11)-O(6)        | 2.495(5) | Mo(12)-O(6)        | 2.450(5) |
| Mo(13)-O(71)       | 1.750(6) | Mo(14)-O(74)       | 1.748(6) | Mo(15)-O(75)       | 1.726(6) |
| Mo(13)-O(59)       | 1.755(6) | Mo(14)-O(73)       | 1.751(6) | Mo(15)-O(5)        | 1.931(6) |
| Mo(13)-O(30)       | 1.882(5) | Mo(14)-O(36)       | 1.899(5) | Mo(15)-O(2)        | 1.941(5) |
| Mo(13)-O(47)       | 2.078(5) | Mo(14)-O(43)       | 2.097(5) | Mo(15)-O(15)       | 2.010(5) |
| Mo(13)-O(63)       | 2.406(5) | Mo(14)-O(40)       | 2.400(5) | Mo(15)-O(52)       | 2.143(6) |
| Mo(13)-O(41)       | 2.450(5) | Mo(14)-O(61)       | 2.439(5) | Mo(15)-O(7)        | 2.354(5) |
| Mo(16)-O(68)       | 1.747(6) | Mo(17)-O(72)       | 1.739(6) | Mo(18)-O(23)       | 1.720(5) |
| Mo(16)-O(64)       | 1.755(6) | Mo(17)-O(26)       | 1.842(5) | Mo(18)-O(34)       | 1.932(5) |
| Mo(16)-O(1)        | 1.998(5) | Mo(17)-O(52)       | 1.843(6) | Mo(18)-O(4)        | 1.941(5) |
| Mo(16)-O(36)       | 2.003(5) | Mo(17)-O(62)       | 2.127(5) | Mo(18)-O(15)       | 1.991(5) |
| Mo(16)-O(44)       | 2.344(5) | Mo(17)-O(55)       | 2.140(5) | Mo(18)-O(26)       | 2.157(5) |
| Mo(16)-O(10)       | 2.354(5) | Mo(17)-O(6)        | 2.476(5) | Mo(18)-O(7)        | 2.363(5) |
| P(1)-O(38)         | 1.558(5) | P(2)-O(7)          | 1.562(5) | P(3)-O(42)         | 1.537(5) |
| P(1)-O(20)         | 1.563(5) | P(2)-O(3)          | 1.564(5) | P(3)-O(22)         | 1.578(5) |
| P(1)-O(25)         | 1.570(5) | P(2)-O(16)         | 1.569(5) | P(3)-O(37)         | 1.583(5) |
| P(1)-O(33)         | 1.623(5) | P(2)-O(6)          | 1.618(5) | P(3)-O(41)         | 1.612(5) |
| P(4)-O(21)         | 1.546(5) | P(5)-O(10)         | 1.549(5) | P(6)-O(28)         | 1.559(5) |
| P(4)-O(8)          | 1.574(5) | P(5)-O(57)         | 1.565(6) | P(6)-O(44)         | 1.562(5) |
| P(4)-O(11)         | 1.580(5) | P(5)-O(61)         | 1.599(5) | P(6)-O(46)         | 1.587(6) |
| P(4)-O(63)         | 1.621(5) | P(5)-O(66)         | 1.607(5) | P(6)-O(40)         | 1.603(5) |
| Sr(1)-O(11)        | 2.602(5) | Sr(1)-O(22)        | 2.616(5) | Sr(1)-O(44)        | 2.654(5) |
| Sr(1)-O(10)        | 2.704(5) | Sr(1)-O(16)        | 2.705(5) | Sr(1)-O(3)         | 2.709(5) |
| Sr(1)-O(20)        | 2.726(5) | Sr(1)-O(38)        | 2.732(5) | Sr(1)-O(1)         | 2.934(5) |
| Co(1)-O(42)#1      | 2.093(5) | Co(1)-O(21)        | 2.106(5) | Co(1)-O(39)#1      | 2.163(5) |
| Co(1)-O(14)        | 2.169(5) | Co(1)-O(70)        | 2.181(6) | Co(1)-O(35)        | 2.220(5) |
| O(60)-Mo(1)-O(4)   | 100.5(2) | O(14)-Mo(2)-O(39)  | 103.6(2) | O(69)-Mo(3)-O(9)   | 98.5(2)  |
| O(60)-Mo(1)-O(45)  | 101.5(2) | O(14)-Mo(2)-O(1)   | 99.7(2)  | O(69)-Mo(3)-O(5)   | 101.4(2) |
| O(60)-Mo(1)-O(13)  | 100.9(2) | O(14)-Mo(2)-O(30)  | 94.2(2)  | O(69)-Mo(3)-O(51)  | 94.2(2)  |
| O(60)-Mo(1)-O(56)  | 91.9(2)  | O(14)-Mo(2)-O(11)  | 90.1(2)  | O(69)-Mo(3)-O(57)  | 95.6(2)  |
| O(60)-Mo(1)-O(25)  | 168.2(2) | O(14)-Mo(2)-O(22)  | 166.0(2) | O(69)-Mo(3)-O(16)  | 173.3(2) |
| O(49)-Mo(4)-O(17)  | 104.8(2) | O(27)-Mo(5)-O(18)  | 104.7(3) | O(50)-Mo(6)-O(12)  | 99.5(2)  |
| O(49)-Mo(4)-O(31)  | 101.6(2) | O(27)-Mo(5)-O(19)  | 100.9(2) | O(50)-Mo(6)-O(34)  | 101.1(2) |
| O(49)-Mo(4)-O(47)  | 99.6(2)  | O(27)-Mo(5)-O(47)  | 98.5(2)  | O(50)-Mo(6)-O(28)  | 96.1(2)  |
| O(49)-Mo(4)-O(41)  | 97.1(2)  | O(27)-Mo(5)-O(63)  | 98.2(2)  | O(50)-Mo(6)-O(32)  | 93.3(2)  |
| O(49)-Mo(4)-O(33)  | 170.6(2) | O(27)-Mo(5)-O(33)  | 170.0(2) | O(50)-Mo(6)-O(3)   | 172.8(2) |
| O(65)-Mo(7)-O(9)   | 99.9(2)  | O(58)-Mo(8)-O(2)   | 100.2(2) | O(24)-Mo(9)-O(45)  | 101.7(2) |
| O(65)-Mo(7)-O(29)  | 100.3(2) | O(58)-Mo(8)-O(29)  | 100.4(2) | O(24)-Mo(9)-O(12)  | 98.5(2)  |
| O(65)-Mo(7)-O(8)   | 97.1(2)  | O(58)-Mo(8)-O(13)  | 102.1(2) | O(24)-Mo(9)-O(17)  | 93.2(2)  |
| O(65)-Mo(7)-O(18)  | 91.8(2)  | O(58)-Mo(8)-O(53)  | 93.0(2)  | O(24)-Mo(9)-O(37)  | 94.7(2)  |
| O(65)-Mo(7)-O(20)  | 172.9(2) | O(58)-Mo(8)-O(25)  | 169.5(2) | O(24)-Mo(9)-O(38)  | 172.0(2) |
| O(54)-Mo(10)-O(53) | 105.6(3) | O(48)-Mo(11)-O(32) | 104.4(3) | O(67)-Mo(12)-O(51) | 104.5(3) |
| O(54)-Mo(10)-O(56) | 105.0(3) | O(48)-Mo(11)-O(55) | 102.2(3) | O(67)-Mo(12)-O(62) | 101.7(3) |
| O(54)-Mo(10)-O(31) | 93.7(2)  | O(48)-Mo(11)-O(43) | 99.1(2)  | O(67)-Mo(12)-O(43) | 97.4(2)  |
| O(54)-Mo(10)-O(19) | 94.0(2)  | O(48)-Mo(11)-O(40) | 96.9(2)  | O(67)-Mo(12)-O(61) | 97.1(2)  |
| O(54)-Mo(10)-O(33) | 161.3(2) | O(48)-Mo(11)-O(6)  | 170.4(2) | O(67)-Mo(12)-O(6)  | 169.7(2) |
| O(71)-Mo(13)-O(59) | 102.6(3) | O(74)-Mo(14)-O(73) | 103.1(3) | O(75)-Mo(15)-O(5)  | 101.9(3) |
| O(71)-Mo(13)-O(30) | 104.3(3) | O(74)-Mo(14)-O(36) | 104.6(3) | O(75)-Mo(15)-O(2)  | 100.5(2) |
| O(71)-Mo(13)-O(47) | 99.3(2)  | O(74)-Mo(14)-O(43) | 99.1(2)  | O(75)-Mo(15)-O(15) | 100.1(3) |

|                     |            |                       |            |                     |           |
|---------------------|------------|-----------------------|------------|---------------------|-----------|
| O(71)-Mo(13)-O(63)  | 85.7(2)    | O(74)-Mo(14)-O(40)    | 87.1(2)    | O(75)-Mo(15)-O(52)  | 92.9(2)   |
| O(71)-Mo(13)-O(41)  | 166.7(2)   | O(74)-Mo(14)-O(61)    | 166.4(2)   | O(75)-Mo(15)-O(7)   | 169.1(2)  |
| O(68)-Mo(16)-O(64)  | 103.5(3)   | O(72)-Mo(17)-O(26)    | 104.7(3)   | O(23)-Mo(18)-O(34)  | 101.1(2)  |
| O(68)-Mo(16)-O(1)   | 99.2(2)    | O(72)-Mo(17)-O(52)    | 104.9(3)   | O(23)-Mo(18)-O(4)   | 101.3(2)  |
| O(68)-Mo(16)-O(36)  | 99.0(2)    | O(72)-Mo(17)-O(62)    | 96.7(3)    | O(23)-Mo(18)-O(15)  | 100.7(2)  |
| O(68)-Mo(16)-O(44)  | 168.8(2)   | O(72)-Mo(17)-O(55)    | 95.7(3)    | O(23)-Mo(18)-O(26)  | 91.4(2)   |
| O(68)-Mo(16)-O(10)  | 91.2(2)    | O(72)-Mo(17)-O(6)     | 163.3(2)   | O(23)-Mo(18)-O(7)   | 167.6(2)  |
| O(38)-P(1)-O(20)    | 108.0(3)   | O(7)-P(2)-O(3)        | 111.1(3)   | O(42)-P(3)-O(22)    | 110.8(3)  |
| O(38)-P(1)-O(25)    | 110.9(3)   | O(7)-P(2)-O(16)       | 111.1(3)   | O(42)-P(3)-O(37)    | 109.1(3)  |
| O(38)-P(1)-O(33)    | 109.6(3)   | O(7)-P(2)-O(6)        | 107.6(3)   | O(42)-P(3)-O(41)    | 111.7(3)  |
| O(21)-P(4)-O(8)     | 110.4(3)   | O(10)-P(5)-O(57)      | 111.1(3)   | O(28)-P(6)-O(44)    | 111.0(3)  |
| O(21)-P(4)-O(11)    | 110.3(3)   | O(10)-P(5)-O(61)      | 109.8(3)   | O(28)-P(6)-O(46)    | 104.5(3)  |
| O(21)-P(4)-O(63)    | 109.3(3)   | O(10)-P(5)-O(66)      | 110.8(3)   | O(28)-P(6)-O(40)    | 112.2(3)  |
| O(11)-Sr(1)-O(22)   | 64.57(15)  | O(11)-Sr(1)-O(44)     | 115.98(16) | O(11)-Sr(1)-O(10)   | 79.99(16) |
| O(11)-Sr(1)-O(16)   | 118.81(15) | O(11)-Sr(1)-O(3)      | 170.91(15) | O(11)-Sr(1)-O(20)   | 72.52(15) |
| O(11)-Sr(1)-O(38)   | 100.96(15) | O(11)-Sr(1)-O(1)      | 58.18(14)  |                     |           |
| O(42)#1-Co(1)-O(21) | 176.6(2)   | O(42)#1-Co(1)-O(39)#1 | 90.11(19)  | O(42)#1-Co(1)-O(14) | 91.66(19) |
| O(42)#1-Co(1)-O(70) | 84.8(2)    | O(42)#1-Co(1)-O(35)   | 98.0(2)    |                     |           |

Symmetry transformations used to generate equivalent atoms: #1 -x,-y,-z; #2 -x+1/2,-y+1/2,-z

**Table S3** Selected bond lengths (Å) and bond angles (°) of compound **3**

|              |          |              |          |              |          |
|--------------|----------|--------------|----------|--------------|----------|
| Mo(1)-O(59)  | 1.675(6) | Mo(1)-O(39)  | 1.775(5) | Mo(1)-O(17)  | 1.800(6) |
| Mo(1)-O(31)  | 2.040(5) | Mo(1)-O(27)  | 2.123(5) | Mo(1)-O(20)  | 2.431(5) |
| Mo(2)-O(69)  | 1.676(6) | Mo(2)-O(3)   | 1.861(5) | Mo(2)-O(42)  | 1.873(5) |
| Mo(2)-O(6)   | 1.921(5) | Mo(2)-O(29)  | 2.101(6) | Mo(2)-O(24)  | 2.266(5) |
| Mo(3)-O(26)  | 1.663(5) | Mo(3)-O(44)  | 1.770(6) | Mo(3)-O(35)  | 1.807(5) |
| Mo(3)-O(31)  | 2.053(5) | Mo(3)-O(46)  | 2.095(5) | Mo(3)-O(20)  | 2.394(5) |
| Mo(4)-O(62)  | 1.669(6) | Mo(4)-O(5)   | 1.875(6) | Mo(4)-O(7)   | 1.880(5) |
| Mo(4)-O(43)  | 2.023(5) | Mo(4)-O(28)  | 2.048(6) | Mo(4)-O(32)  | 2.217(5) |
| Mo(5)-O(74)  | 1.674(6) | Mo(5)-O(4)   | 1.856(5) | Mo(5)-O(41)  | 1.871(5) |
| Mo(5)-O(14)  | 2.021(5) | Mo(5)-O(36)  | 2.023(6) | Mo(5)-O(16)  | 2.223(5) |
| Mo(6)-O(66)  | 1.676(6) | Mo(6)-O(2)   | 1.854(5) | Mo(6)-O(19)  | 1.884(6) |
| Mo(6)-O(6)   | 1.895(6) | Mo(6)-O(30)  | 2.123(6) | Mo(6)-O(24)  | 2.291(5) |
| Mo(7)-O(63)  | 1.686(6) | Mo(7)-O(67)  | 1.695(6) | Mo(7)-O(8)   | 1.814(5) |
| Mo(7)-O(31)  | 2.027(6) | Mo(7)-O(46)  | 2.335(5) | Mo(7)-O(27)  | 2.367(5) |
| Mo(8)-O(40)  | 1.673(6) | Mo(8)-O(30)  | 1.778(6) | Mo(8)-O(29)  | 1.779(6) |
| Mo(8)-O(17)  | 2.065(6) | Mo(8)-O(35)  | 2.068(5) | Mo(8)-O(20)  | 2.367(5) |
| Mo(9)-O(54)  | 1.679(5) | Mo(9)-O(4)   | 1.854(5) | Mo(9)-O(42)  | 1.873(5) |
| Mo(9)-O(39)  | 2.015(5) | Mo(9)-O(23)  | 2.049(5) | Mo(9)-O(49)  | 2.193(5) |
| Mo(10)-O(72) | 1.672(6) | Mo(10)-O(5)  | 1.870(6) | Mo(10)-O(2)  | 1.872(5) |
| Mo(10)-O(50) | 1.950(6) | Mo(10)-O(10) | 2.074(6) | Mo(10)-O(21) | 2.277(5) |
| Mo(11)-O(53) | 1.670(6) | Mo(11)-O(14) | 1.783(5) | Mo(11)-O(61) | 1.796(6) |
| Mo(11)-O(38) | 2.044(5) | Mo(11)-O(25) | 2.134(5) | Mo(11)-O(18) | 2.416(5) |
| Mo(12)-O(55) | 1.708(5) | Mo(12)-O(45) | 1.722(5) | Mo(12)-O(1)  | 1.864(5) |
| Mo(12)-O(8)  | 1.960(5) | Mo(12)-O(12) | 2.191(5) | Mo(12)-O(22) | 2.197(5) |
| Mo(13)-O(65) | 1.674(6) | Mo(13)-O(43) | 1.771(5) | Mo(13)-O(51) | 1.807(6) |
| Mo(13)-O(38) | 2.046(5) | Mo(13)-O(58) | 2.124(6) | Mo(13)-O(18) | 2.353(5) |
| Mo(14)-O(71) | 1.685(6) | Mo(14)-O(52) | 1.689(6) | Mo(14)-O(11) | 1.838(6) |
| Mo(14)-O(38) | 2.029(6) | Mo(14)-O(25) | 2.303(6) |              |          |
| Mo(15)-O(48) | 1.683(6) | Mo(15)-O(70) | 1.687(6) | Mo(15)-O(1)  | 1.923(5) |
| Mo(15)-O(11) | 1.932(6) | Mo(15)-O(15) | 2.271(6) | Mo(15)-O(60) | 2.274(6) |
| Mo(16)-O(73) | 1.674(6) | Mo(16)-O(7)  | 1.834(5) | Mo(16)-O(19) | 1.875(6) |
| Mo(16)-O(34) | 2.020(5) | Mo(16)-O(44) | 2.037(6) | Mo(16)-O(33) | 2.205(5) |
| Mo(17)-O(64) | 1.691(6) | Mo(17)-O(9)  | 1.779(6) | Mo(17)-O(10) | 1.783(6) |
| Mo(17)-O(61) | 2.070(6) | Mo(17)-O(51) | 2.070(6) | Mo(17)-O(18) | 2.405(6) |
| Mo(18)-O(37) | 1.658(6) | Mo(18)-O(41) | 1.869(5) | Mo(18)-O(3)  | 1.869(5) |

|                     |            |                     |            |                       |            |
|---------------------|------------|---------------------|------------|-----------------------|------------|
| Mo(18)-O(50)        | 1.926(6)   | Mo(18)-O(9)         | 2.085(6)   | Mo(18)-O(21)          | 2.278(5)   |
| P(1)-O(33)          | 1.505(5)   | P(2)-O(32)          | 1.505(5)   | P(3)-O(56)            | 1.497(5)   |
| P(1)-O(49)          | 1.507(5)   | P(2)-O(16)          | 1.508(6)   | P(3)-O(22)            | 1.528(5)   |
| P(1)-O(24)          | 1.523(6)   | P(2)-O(21)          | 1.532(6)   | P(3)-O(23)            | 1.536(6)   |
| P(1)-O(20)          | 1.564(5)   | P(2)-O(18)          | 1.565(6)   | P(3)-O(27)            | 1.552(5)   |
| P(4)-O(13)          | 1.503(5)   | P(5)-O(28)          | 1.507(6)   | P(6)-O(60)            | 1.508(6)   |
| P(4)-O(34)          | 1.521(5)   | P(5)-O(15)          | 1.514(6)   | P(6)-O(36)            | 1.514(6)   |
| P(4)-O(12)          | 1.522(5)   | P(5)-O(57)          | 1.546(6)   | P(6)-O(68)            | 1.538(6)   |
| P(4)-O(46)          | 1.565(5)   | P(5)-O(41)          | 1.560(6)   | P(6)-O(25)            | 1.561(6)   |
| Sr(1)-O(12)         | 2.519(5)   | Sr(1)-O(15)         | 2.613(6)   | Sr(1)-O(33)           | 2.638(5)   |
| Sr(1)-O(22)         | 2.522(5)   | Sr(1)-O(32)         | 2.612(5)   | Sr(1)-O(49)           | 2.648(5)   |
| Sr(1)-O(60)         | 2.569(5)   | Sr(1)-O(16)         | 2.630(5)   | Sr(1)-O(1)            | 2.852(6)   |
| Ni(1)-O(56)#1       | 2.017(5)   | Ni(1)-O(13)         | 2.031(5)   | Ni(1)-O(45)#1         | 2.063(5)   |
| Ni(1)-O(55)         | 2.088(5)   | Ni(1)-O(75)         | 2.051(6)   | Ni(1)-O(47)           | 2.066(6)   |
| O(59)-Mo(1)-O(39)   | 105.1(3)   | O(69)-Mo(2)-O(3)    | 100.9(3)   | O(26)-Mo(3)-O(44)     | 104.5(3)   |
| O(59)-Mo(1)-O(17)   | 102.1(3)   | O(69)-Mo(2)-O(42)   | 101.7(3)   | O(26)-Mo(3)-O(35)     | 101.3(3)   |
| O(59)-Mo(1)-O(31)   | 99.4(3)    | O(69)-Mo(2)-O(6)    | 100.5(3)   | O(26)-Mo(3)-O(31)     | 98.1(3)    |
| O(59)-Mo(1)-O(27)   | 96.4(3)    | O(69)-Mo(2)-O(29)   | 91.9(3)    | O(26)-Mo(3)-O(46)     | 97.9(3)    |
| O(59)-Mo(1)-O(20)   | 170.4(2)   | O(69)-Mo(2)-O(24)   | 168.4(2)   | O(26)-Mo(3)-O(20)     | 169.9(2)   |
| O(62)-Mo(4)-O(5)    | 101.4(3)   | O(74)-Mo(5)-O(4)    | 99.8(3)    | O(66)-Mo(6)-O(2)      | 100.2(3)   |
| O(62)-Mo(4)-O(7)    | 98.4(3)    | O(74)-Mo(5)-O(41)   | 100.6(3)   | O(66)-Mo(6)-O(19)     | 100.6(3)   |
| O(62)-Mo(4)-O(43)   | 93.7(3)    | O(74)-Mo(5)-O(14)   | 92.9(3)    | O(66)-Mo(6)-O(6)      | 101.6(3)   |
| O(62)-Mo(4)-O(28)   | 95.8(3)    | O(74)-Mo(5)-O(36)   | 96.9(3)    | O(66)-Mo(6)-O(30)     | 92.8(3)    |
| O(62)-Mo(4)-O(32)   | 173.4(2)   | O(74)-Mo(5)-O(16)   | 173.2(3)   | O(66)-Mo(6)-O(24)     | 169.4(2)   |
| O(63)-Mo(7)-O(67)   | 102.8(3)   | O(40)-Mo(8)-O(30)   | 105.6(3)   | O(54)-Mo(9)-O(4)      | 98.3(3)    |
| O(63)-Mo(7)-O(8)    | 104.4(3)   | O(40)-Mo(8)-O(29)   | 104.8(3)   | O(54)-Mo(9)-O(42)     | 101.8(3)   |
| O(63)-Mo(7)-O(31)   | 99.1(3)    | O(40)-Mo(8)-O(17)   | 93.5(3)    | O(54)-Mo(9)-O(39)     | 93.3(2)    |
| O(63)-Mo(7)-O(46)   | 85.9(3)    | O(40)-Mo(8)-O(35)   | 93.7(3)    | O(54)-Mo(9)-O(23)     | 94.8(2)    |
| O(63)-Mo(7)-O(27)   | 166.9(2)   | O(40)-Mo(8)-O(20)   | 160.7(3)   | O(54)-Mo(9)-O(49)     | 171.8(2)   |
| O(72)-Mo(10)-O(5)   | 102.2(3)   | O(53)-Mo(11)-O(14)  | 104.6(3)   | O(55)-Mo(12)-O(45)    | 103.8(3)   |
| O(72)-Mo(10)-O(2)   | 100.5(3)   | O(53)-Mo(11)-O(61)  | 102.5(3)   | O(55)-Mo(12)-O(1)     | 99.3(2)    |
| O(72)-Mo(10)-O(50)  | 100.1(3)   | O(53)-Mo(11)-O(38)  | 98.8(3)    | O(55)-Mo(12)-O(8)     | 94.8(2)    |
| O(72)-Mo(10)-O(10)  | 92.9(3)    | O(53)-Mo(11)-O(25)  | 96.4(3)    | O(55)-Mo(12)-O(12)    | 90.0(2)    |
| O(72)-Mo(10)-O(21)  | 169.3(3)   | O(53)-Mo(11)-O(18)  | 170.0(2)   | O(55)-Mo(12)-O(22)    | 165.7(2)   |
| O(65)-Mo(13)-O(43)  | 104.5(3)   | O(71)-Mo(14)-O(52)  | 102.8(3)   | O(48)-Mo(15)-O(70)    | 103.8(3)   |
| O(65)-Mo(13)-O(51)  | 101.2(3)   | O(71)-Mo(14)-O(11)  | 105.7(3)   | O(48)-Mo(15)-O(1)     | 98.5(3)    |
| O(65)-Mo(13)-O(38)  | 96.4(3)    | O(71)-Mo(14)-O(38)  | 96.7(3)    | O(48)-Mo(15)-O(11)    | 99.7(3)    |
| O(65)-Mo(13)-O(58)  | 96.7(3)    | O(71)-Mo(14)-O(25)  | 164.0(3)   | O(48)-Mo(15)-O(15)    | 91.4(3)    |
| O(65)-Mo(13)-O(18)  | 169.0(2)   |                     |            | O(48)-Mo(15)-O(60)    | 168.7(3)   |
| O(73)-Mo(16)-O(7)   | 99.7(3)    | O(64)-Mo(17)-O(9)   | 104.2(3)   | O(37)-Mo(18)-O(41)    | 101.6(3)   |
| O(73)-Mo(16)-O(19)  | 100.0(3)   | O(64)-Mo(17)-O(10)  | 104.6(3)   | O(37)-Mo(18)-O(3)     | 102.2(3)   |
| O(73)-Mo(16)-O(34)  | 97.4(2)    | O(64)-Mo(17)-O(61)  | 95.7(3)    | O(37)-Mo(18)-O(50)    | 100.0(3)   |
| O(73)-Mo(16)-O(44)  | 91.5(3)    | O(64)-Mo(17)-O(51)  | 96.7(3)    | O(37)-Mo(18)-O(9)     | 90.7(3)    |
| O(73)-Mo(16)-O(33)  | 172.9(2)   | O(64)-Mo(17)-O(18)  | 163.1(3)   | O(37)-Mo(18)-O(21)    | 167.1(2)   |
| O(33)-P(1)-O(49)    | 108.2(3)   | O(33)-P(1)-O(24)    | 111.6(3)   | O(33)-P(1)-O(20)      | 109.2(3)   |
| O(32)-P(2)-O(16)    | 108.0(3)   | O(32)-P(2)-O(21)    | 111.1(3)   | O(32)-P(2)-O(18)      | 109.0(3)   |
| O(56)-P(3)-O(22)    | 110.2(3)   | O(56)-P(3)-O(23)    | 109.8(3)   | O(56)-P(3)-O(27)      | 111.4(3)   |
| O(13)-P(4)-O(34)    | 110.9(3)   | O(13)-P(4)-O(12)    | 110.0(3)   | O(13)-P(4)-O(46)      | 109.1(3)   |
| O(28)-P(5)-O(15)    | 111.9(3)   | O(28)-P(5)-O(58)    | 111.3(3)   | O(28)-P(5)-O(57)      | 108.2(3)   |
| O(60)-P(6)-O(36)    | 111.4(3)   | O(60)-P(6)-O(68)    | 111.9(3)   | O(60)-P(6)-O(25)      | 108.4(3)   |
| O(12)-Sr(1)-O(22)   | 64.62(17)  | O(12)-Sr(1)-O(32)   | 119.24(17) | O(12)-Sr(1)-O(49)     | 101.33(16) |
| O(12)-Sr(1)-O(60)   | 115.76(18) | O(12)-Sr(1)-O(16)   | 170.77(17) | O(12)-Sr(1)-O(1)      | 58.08(16)  |
| O(12)-Sr(1)-O(15)   | 79.46(17)  | O(12)-Sr(1)-O(33)   | 72.83(17)  | O(56)#1-Ni(1)-O(55)   | 90.8(2)    |
| O(56)#1-Ni(1)-O(13) | 177.2(2)   | O(56)#1-Ni(1)-O(75) | 85.1(2)    | O(56)#1-Ni(1)-O(45)#1 | 90.5(2)    |
| O(56)#1-Ni(1)-O(47) | 97.4(2)    |                     |            |                       |            |

Symmetry transformations used to generate equivalent atoms: #1 -x,-y,-z; #2 -x+1/2,-y+1/2,-z



**Table S4** Selected bond lengths (Å) and bond angles (°) of compound **4**

|                   |           |                   |           |                     |           |
|-------------------|-----------|-------------------|-----------|---------------------|-----------|
| Mo(1)-O(45)       | 1.670(9)  | Mo(2)-O(55)       | 1.679(9)  | Mo(3)-O(66)         | 1.678(10) |
| Mo(1)-O(8)        | 1.865(9)  | Mo(2)-O(2)        | 1.860(9)  | Mo(3)-O(7)          | 1.869(10) |
| Mo(1)-O(15)       | 1.883(9)  | Mo(2)-O(44)       | 1.876(9)  | Mo(3)-O(56)         | 1.889(10) |
| Mo(1)-O(10)       | 2.038(9)  | Mo(2)-O(23)       | 2.037(9)  | Mo(3)-O(49)         | 1.941(10) |
| Mo(1)-O(12)       | 2.054(9)  | Mo(2)-O(52)       | 2.071(9)  | Mo(3)-O(41)         | 2.101(9)  |
| Mo(1)-O(27)       | 2.226(8)  | Mo(2)-O(1)        | 2.222(8)  | Mo(3)-O(9)          | 2.285(8)  |
| Mo(4)-O(68)       | 1.674(9)  | Mo(5)-O(20)       | 2.917(19) | Mo(6)-O(58)         | 1.676(9)  |
| Mo(4)-O(18)       | 1.869(9)  | Mo(5)-O(70)       | 1.782(10) | Mo(6)-O(17)         | 1.782(9)  |
| Mo(4)-O(5)        | 1.869(9)  | Mo(5)-O(16)       | 1.794(9)  | Mo(6)-O(30)         | 1.810(10) |
| Mo(4)-O(19)       | 1.922(9)  | Mo(5)-O(30)       | 2.078(9)  | Mo(6)-O(25)         | 2.068(9)  |
| Mo(4)-O(70)       | 2.123(10) | Mo(5)-O(28)       | 2.086(10) | Mo(6)-O(26)         | 2.121(9)  |
| Mo(4)-O(70)       | 2.290(8)  | Mo(5)-O(13)       | 2.398(8)  | Mo(6)-O(13)         | 2.429(9)  |
| Mo(7)-O(48)       | 1.688(9)  | Mo(8)-O(42)       | 1.681(9)  | Mo(9)-O(64)         | 1.709(10) |
| Mo(7)-O(2)        | 1.876(9)  | Mo(8)-O(10)       | 1.782(9)  | Mo(9)-O(65)         | 1.713(10) |
| Mo(7)-O(5)        | 1.896(9)  | Mo(8)-O(28)       | 1.796(9)  | Mo(9)-O(4)          | 1.876(9)  |
| Mo(7)-O(17)       | 2.029(9)  | Mo(8)-O(25)       | 2.056(9)  | Mo(9)-O(14)         | 1.989(9)  |
| Mo(7)-O(24)       | 2.075(8)  | Mo(8)-O(22)       | 2.121(9)  | Mo(9)-O(11)         | 2.212(9)  |
| Mo(7)-O(36)       | 2.211(8)  | Mo(8)-O(13)       | 2.409(9)  | Mo(9)-O(33)         | 2.214(8)  |
| Mo(10)-O(63)      | 1.696(11) | Mo(11)-O(74)      | 1.697(10) | Mo(12)-O(61)        | 1.680(9)  |
| Mo(10)-O(71)      | 1.693(10) | Mo(11)-O(73)      | 1.704(10) | Mo(12)-O(18)        | 1.885(10) |
| Mo(10)-O(14)      | 1.818(9)  | Mo(11)-O(32)      | 1.848(10) | Mo(12)-O(44)        | 1.888(9)  |
| Mo(10)-O(25)      | 2.033(9)  | Mo(11)-O(43)      | 2.045(10) | Mo(12)-O(49)        | 1.945(10) |
| Mo(10)-O(22)      | 2.328(8)  | Mo(11)-O(34)      | 2.338(9)  | Mo(12)-O(62) (3)#16 | 2.109(10) |
| Mo(10)-O(26)      | 2.408(9)  | Mo(11)-O(53)      | 2.342(9)  | Mo(12)-O(9)         | 2.308(9)  |
| Mo(13)-O(67)      | 1.677(10) | Mo(14)-O(54)      | 1.684(9)  | Mo(15)-O(46)        | 1.688(10) |
| Mo(13)-O(29)      | 1.772(10) | Mo(14)-O(8)       | 1.870(9)  | Mo(15)-O(52)        | 1.762(9)  |
| Mo(13)-O(39)      | 1.824(10) | Mo(14)-O(56)      | 1.896(9)  | Mo(15)-O(60)        | 1.807(10) |
| Mo(13)-O(43)      | 2.055(10) | Mo(14)-O(29)      | 2.041(10) | Mo(15)-O(43)        | 2.058(10) |
| Mo(13)-O(53)      | 2.127(9)  | Mo(14)-O(59)      | 2.060(9)  | Mo(15)-O(34)        | 2.129(9)  |
| Mo(13)-O(21)      | 2.393(9)  | Mo(14)-O(35)      | 2.222(9)  | Mo(15)-O(21)        | 2.429(9)  |
| Mo(16)-O(50)      | 1.668(9)  | Mo(17)-O(51)      | 1.692(10) | Mo(18)-O(57)        | 1.684(9)  |
| Mo(16)-O(7)       | 1.879(10) | Mo(17)-O(72)      | 1.698(10) | Mo(18)-O(41)        | 1.770(10) |
| Mo(16)-O(15)      | 1.892(9)  | Mo(17)-O(4)       | 1.936(9)  | Mo(18)-O(62)        | 1.784(10) |
| Mo(16)-O(19)      | 1.912(9)  | Mo(17)-O(32)      | 1.945(9)  | Mo(18)-O(39)        | 2.073(10) |
| Mo(16)-O(16)      | 2.116(9)  | Mo(17)-O(37)      | 2.272(9)  | Mo(18)-O(60)        | 2.073(10) |
| Mo(16)-O(38)      | 2.312(8)  | Mo(17)-O(6)       | 2.281(9)  | Mo(18)-O(21)        | 2.415(8)  |
| P(1)-O(35)        | 1.513(9)  | P(2)-O(36)        | 1.518(9)  | P(3)-O(31)          | 1.516(9)  |
| P(1)-O(9)         | 1.522(9)  | P(2)-O(27)        | 1.522(8)  | P(3)-O(12)          | 1.517(9)  |
| P(1)-O(1)         | 1.523(9)  | P(2)-O(38)        | 1.528(8)  | P(3)-O(11)          | 1.526(9)  |
| P(1)-O(21)        | 1.572(9)  | P(2)-O(13)        | 1.579(9)  | P(3)-O(22)          | 1.572(9)  |
| P(4)-O(40)        | 1.513(9)  | P(5)-O(59)        | 1.516(10) | P(6)-O(23)          | 1.518(9)  |
| P(4)-O(33)        | 1.532(9)  | P(5)-O(6)         | 1.519(10) | P(6)-O(37)          | 1.527(9)  |
| P(4)-O(24)        | 1.539(9)  | P(5)-O(69)        | 1.534(10) | P(6)-O(47)          | 1.544(10) |
| P(4)-O(26)        | 1.555(9)  | P(5)-O(53)        | 1.566(10) | P(6)-O(34)          | 1.574(9)  |
| Sr(1)-O(11)       | 2.543(9)  | Sr(1)-O(6)        | 2.600(9)  | Sr(1)-O(27)         | 2.645(8)  |
| Sr(1)-O(33)       | 2.555(9)  | Sr(1)-O(35)       | 2.628(9)  | Sr(1)-O(36)         | 2.659(9)  |
| Sr(1)-O(37)       | 2.577(9)  | Sr(1)-O(1)        | 2.641(8)  | Sr(1)-O(4)          | 2.856(9)  |
| Cu(1)-O(40)#1     | 1.935(9)  | Cu(1)-O(64)#1     | 2.124(11) | Cu(1)-O(76)         | 2.195(12) |
| Cu(1)-O(31)       | 1.954(9)  | Cu(1)-O(65)       | 2.157(10) | Cu(1)-O(75)         | 2.241(11) |
| O(45)-Mo(1)-O(8)  | 99.6(4)   | O(55)-Mo(2)-O(2)  | 99.8(4)   | O(66)-Mo(3)-O(7)    | 99.9(5)   |
| O(45)-Mo(1)-O(15) | 100.4(4)  | O(55)-Mo(2)-O(44) | 101.6(4)  | O(66)-Mo(3)-O(56)   | 102.1(5)  |
| O(45)-Mo(1)-O(10) | 92.1(4)   | O(55)-Mo(2)-O(23) | 95.5(4)   | O(66)-Mo(3)-O(49)   | 99.5(5)   |
| O(45)-Mo(1)-O(12) | 96.9(4)   | O(55)-Mo(2)-O(52) | 93.2(4)   | O(66)-Mo(3)-O(41)   | 92.6(4)   |
| O(45)-Mo(1)-O(27) | 172.7(4)  | O(55)-Mo(2)-O(1)  | 172.4(4)  | O(66)-Mo(3)-O(9)    | 168.3(4)  |
| O(68)-Mo(4)-O(18) | 100.5(4)  | O(20)-Mo(5)-O(70) | 104.9(5)  | O(58)-Mo(6)-O(17)   | 104.8(4)  |

|                    |          |                    |          |                     |          |
|--------------------|----------|--------------------|----------|---------------------|----------|
| O(68)-Mo(4)-O(5)   | 101.9(4) | O(20)-Mo(5)-O(16)  | 104.5(4) | O(58)-Mo(6)-O(30)   | 101.6(4) |
| O(68)-Mo(4)-O(19)  | 100.6(4) | O(20)-Mo(5)-O(30)  | 95.6(4)  | O(58)-Mo(6)-O(25)   | 99.4(4)  |
| O(68)-Mo(4)-O(70)  | 91.5(4)  | O(20)-Mo(5)-O(28)  | 95.5(4)  | O(58)-Mo(6)-O(26)   | 96.7(4)  |
| O(68)-Mo(4)-O(38)  | 167.8(4) | O(20)-Mo(5)-O(13)  | 162.7(4) | O(58)-Mo(6)-O(13)   | 170.3(4) |
| O(48)-Mo(7)-O(2)   | 99.1(4)  | O(42)-Mo(8)-O(10)  | 104.6(4) | O(64)-Mo(9)-O(65)   | 102.6(5) |
| O(48)-Mo(7)-O(5)   | 101.4(4) | O(42)-Mo(8)-O(28)  | 100.9(4) | O(64)-Mo(9)-O(4)    | 102.0(4) |
| O(48)-Mo(7)-O(17)  | 93.2(4)  | O(42)-Mo(8)-O(25)  | 98.5(4)  | O(64)-Mo(9)-O(14)   | 91.7(4)  |
| O(48)-Mo(7)-O(24)  | 94.7(4)  | O(42)-Mo(8)-O(22)  | 98.0(4)  | O(64)-Mo(9)-O(11)   | 165.3(4) |
| O(48)-Mo(7)-O(36)  | 172.1(4) | O(42)-Mo(8)-O(13)  | 170.0(4) | O(64)-Mo(9)-O(33)   | 90.1(4)  |
| O(63)-Mo(10)-O(71) | 102.4(5) | O(74)-Mo(11)-O(73) | 102.9(5) | O(61)-Mo(12)-O(18)  | 101.6(5) |
| O(63)-Mo(10)-O(14) | 104.3(5) | O(74)-Mo(11)-O(32) | 106.1(5) | O(61)-Mo(12)-O(44)  | 100.2(5) |
| O(63)-Mo(10)-O(25) | 100.6(4) | O(74)-Mo(11)-O(43) | 96.4(5)  | O(61)-Mo(12)-O(49)  | 102.1(5) |
| O(63)-Mo(10)-O(22) | 85.6(4)  | O(74)-Mo(11)-O(34) | 163.6(4) | O(61)-Mo(12)-O(62)  | 91.3(4)  |
| O(63)-Mo(10)-O(26) | 167.7(4) | O(74)-Mo(11)-O(53) | 85.6(4)  | O(61)-Mo(12)-O(9)   | 167.9(4) |
| O(67)-Mo(13)-O(29) | 105.2(5) | O(54)-Mo(14)-O(8)  | 98.5(4)  | O(46)-Mo(15)-O(52)  | 104.7(5) |
| O(67)-Mo(13)-O(39) | 100.5(5) | O(54)-Mo(14)-O(56) | 100.7(4) | O(46)-Mo(15)-O(60)  | 102.3(5) |
| O(67)-Mo(13)-O(43) | 97.5(5)  | O(54)-Mo(14)-O(29) | 93.3(4)  | O(46)-Mo(15)-O(43)  | 98.5(5)  |
| O(67)-Mo(13)-O(53) | 98.2(5)  | O(54)-Mo(14)-O(59) | 96.4(4)  | O(46)-Mo(15)-O(34)  | 96.8(4)  |
| O(67)-Mo(13)-O(21) | 169.2(4) | O(54)-Mo(14)-O(35) | 173.3(4) | O(46)-Mo(15)-O(21)  | 170.1(4) |
| O(50)-Mo(16)-O(7)  | 99.4(5)  | O(51)-Mo(17)-O(72) | 103.4(5) | O(57)-Mo(18)-O(41)  | 104.6(5) |
| O(50)-Mo(16)-O(15) | 99.7(4)  | O(51)-Mo(17)-O(4)  | 99.1(5)  | O(57)-Mo(18)-O(62)  | 104.2(5) |
| O(50)-Mo(16)-O(19) | 102.9(4) | O(51)-Mo(17)-O(32) | 98.8(5)  | O(57)-Mo(18)-O(39)  | 97.0(5)  |
| O(50)-Mo(16)-O(16) | 93.3(4)  | O(51)-Mo(17)-O(37) | 168.4(4) | O(57)-Mo(18)-O(60)  | 96.1(5)  |
| O(50)-Mo(16)-O(38) | 170.6(4) | O(51)-Mo(17)-O(6)  | 91.6(4)  | O(57)-Mo(18)-O(21)  | 163.7(5) |
| O(35)-P(1)-O(9)    | 111.4(5) | O(36)-P(2)-O(27)   | 107.9(5) | O(31)-P(3)-O(12)    | 110.0(5) |
| O(35)-P(1)-O(1)    | 108.0(5) | O(36)-P(2)-O(38)   | 110.7(5) | O(31)-P(3)-O(11)    | 110.2(5) |
| O(35)-P(1)-O(21)   | 109.4(5) | O(36)-P(2)-O(13)   | 109.2(5) | O(31)-P(3)-O(22)    | 108.3(5) |
| O(40)-P(4)-O(33)   | 109.9(5) | O(59)-P(5)-O(6)    | 110.0(5) | O(23)-P(6)-O(37)    | 110.1(5) |
| O(40)-P(4)-O(24)   | 109.3(5) | O(59)-P(5)-O(69)   | 109.0(6) | O(23)-P(6)-O(47)    | 106.0(6) |
| O(40)-P(4)-O(26)   | 110.6(5) | O(59)-P(5)-O(53)   | 110.6(5) | O(23)-P(6)-O(34)    | 111.5(5) |
| O(11)-Sr(1)-O(33)  | 64.5(3)  | O(11)-Sr(1)-O(1)   | 170.6(3) | O(31)-Cu(1)-O(64)#1 | 86.4(4)  |
| O(11)-Sr(1)-O(37)  | 115.7(3) | O(11)-Sr(1)-O(27)  | 72.1(3)  | O(31)-Cu(1)-O(65)   | 93.5(4)  |
| O(11)-Sr(1)-O(6)   | 80.5(3)  | O(11)-Sr(1)-O(36)  | 100.5(3) | O(31)-Cu(1)-O(76)   | 95.6(4)  |

Symmetry transformations used to generate equivalent atoms: #1 -x,-y,-z; #2 -x+1/2,-y+1/2,-z

**Table S5** Selected bond lengths (Å) and bond angles (°) of compound **5**

|              |          |              |          |              |          |
|--------------|----------|--------------|----------|--------------|----------|
| Mo(1)-O(40)  | 1.691(5) | Mo(1)-O(50)  | 1.795(5) | Mo(1)-O(6)   | 1.830(5) |
| Mo(1)-O(33)  | 2.089(5) | Mo(1)-O(30)  | 2.145(5) | Mo(1)-O(21)  | 2.465(5) |
| Mo(2)-O(68)  | 1.713(5) | Mo(2)-O(17)  | 1.807(5) | Mo(2)-O(44)  | 1.809(5) |
| Mo(2)-O(6)   | 2.109(5) | Mo(2)-O(52)  | 2.111(5) | Mo(2)-O(21)  | 2.392(5) |
| Mo(3)-O(57)  | 1.699(5) | Mo(3)-O(3)   | 1.894(5) | Mo(3)-O(27)  | 1.910(5) |
| Mo(3)-O(7)   | 1.950(5) | Mo(3)-O(44)  | 2.135(5) | Mo(3)-O(20)  | 2.308(5) |
| Mo(4)-O(71)  | 1.696(5) | Mo(4)-O(39)  | 1.796(5) | Mo(4)-O(63)  | 1.816(5) |
| Mo(4)-O(51)  | 2.075(5) | Mo(4)-O(23)  | 2.163(5) | Mo(4)-O(18)  | 2.461(5) |
| Mo(5)-O(70)  | 1.688(6) | Mo(5)-O(32)  | 1.902(5) | Mo(5)-O(5)   | 1.916(5) |
| Mo(5)-O(37)  | 2.056(5) | Mo(5)-O(31)  | 2.086(5) | Mo(5)-O(43)  | 2.257(5) |
| Mo(6)-O(54)  | 1.705(6) | Mo(6)-O(32)  | 1.873(5) | Mo(6)-O(9)   | 1.897(5) |
| Mo(6)-O(29)  | 2.048(5) | Mo(6)-O(25)  | 2.072(5) | Mo(6)-O(8)   | 2.242(5) |
| Mo(7)-O(66)  | 1.694(5) | Mo(7)-O(25)  | 1.791(5) | Mo(7)-O(52)  | 1.832(5) |
| Mo(7)-O(33)  | 2.085(5) | Mo(7)-O(64)  | 2.132(5) | Mo(7)-O(21)  | 2.441(5) |
| Mo(8)-O(72)  | 1.710(6) | Mo(8)-O(69)  | 1.715(5) | Mo(8)-O(11)  | 1.868(5) |
| Mo(8)-O(51)  | 2.066(5) | Mo(8)-O(23)  | 2.362(5) | Mo(8)-O(60)  | 2.395(5) |
| Mo(9)-O(26)  | 1.738(5) | Mo(9)-O(35)  | 1.741(5) | Mo(9)-O(1)   | 1.888(5) |
| Mo(9)-O(12)  | 1.998(5) | Mo(9)-O(19)  | 2.233(5) | Mo(9)-O(13)  | 2.238(5) |
| Mo(10)-O(59) | 1.700(6) | Mo(10)-O(4)  | 1.885(5) | Mo(10)-O(46) | 1.899(5) |
| Mo(10)-O(39) | 2.062(5) | Mo(10)-O(14) | 2.065(5) | Mo(10)-O(15) | 2.255(5) |

|                    |          |                    |          |                    |          |
|--------------------|----------|--------------------|----------|--------------------|----------|
| Mo(11)-O(56)       | 1.688(5) | Mo(11)-O(2)        | 1.875(5) | Mo(11)-O(9)        | 1.920(5) |
| Mo(11)-O(7)        | 1.927(5) | Mo(11)-O(17)       | 2.151(5) | Mo(11)-O(20)       | 2.323(5) |
| Mo(12)-O(34)       | 1.687(5) | Mo(12)-O(4)        | 1.888(5) | Mo(12)-O(27)       | 1.900(5) |
| Mo(12)-O(50)       | 2.056(5) | Mo(12)-O(28)       | 2.084(5) | Mo(12)-O(41)       | 2.233(5) |
| Mo(13)-O(73)       | 1.713(5) | Mo(13)-O(62)       | 1.804(6) | Mo(13)-O(24)       | 1.807(5) |
| Mo(13)-O(42)       | 2.099(5) | Mo(13)-O(63)       | 2.111(5) | Mo(13)-O(18)       | 2.433(5) |
| Mo(14)-O(61)       | 1.701(5) | Mo(14)-O(37)       | 1.796(5) | Mo(14)-O(42)       | 1.824(5) |
| Mo(14)-O(51)       | 2.071(5) | Mo(14)-O(60)       | 2.160(5) | Mo(14)-O(18)       | 2.397(5) |
| Mo(15)-O(75)       | 1.717(6) | Mo(15)-O(67)       | 1.721(6) | Mo(15)-O(12)       | 1.840(5) |
| Mo(15)-O(33)       | 2.048(5) | Mo(15)-O(64)       | 2.372(5) | Mo(15)-O(20)       | 2.404(5) |
| Mo(16)-O(47)       | 1.709(5) | Mo(16)-O(55)       | 1.717(6) | Mo(16)-O(11)       | 1.963(5) |
| Mo(16)-O(1)        | 1.964(5) | Mo(16)-O(10)       | 2.315(5) | Mo(16)-O(36)       | 2.321(5) |
| Mo(17)-O(49)       | 1.689(5) | Mo(17)-O(3)        | 1.901(5) | Mo(17)-O(46)       | 1.906(5) |
| Mo(17)-O(22)       | 1.957(5) | Mo(17)-O(24)       | 2.120(5) | Mo(17)-O(58)       | 2.320(5) |
| Mo(18)-O(53)       | 1.699(5) | Mo(18)-O(5)        | 1.891(5) | Mo(18)-O(2)        | 1.911(5) |
| Mo(18)-O(22)       | 1.984(5) | Mo(18)-O(62)       | 2.108(5) | Mo(18)-O(58)       | 2.317(5) |
| P(1)-O(41)         | 1.534(5) | P(1)-O(8)          | 1.535(5) | P(2)-O(43)         | 1.529(5) |
| P(1)-O(21)         | 1.594(5) | P(1)-O(20)         | 1.549(5) | P(2)-O(15)         | 1.537(5) |
| P(2)-O(58)         | 1.551(5) | P(3)-O(48)         | 1.524(5) | P(3)-O(28)         | 1.566(5) |
| P(2)-O(18)         | 1.590(5) | P(3)-O(13)         | 1.555(5) | P(3)-O(30)         | 1.584(5) |
| P(4)-O(16)         | 1.532(5) | P(4)-O(29)         | 1.553(5) | P(5)-O(31)         | 1.531(5) |
| P(4)-O(19)         | 1.553(5) | P(4)-O(64)         | 1.591(5) | P(5)-O(10)         | 1.536(5) |
| P(5)-O(60)         | 1.576(5) | P(6)-O(36)         | 1.531(5) | P(6)-O(38)         | 1.563(5) |
| P(5)-O(65)         | 1.591(5) | P(6)-O(14)         | 1.537(5) | P(6)-O(23)         | 1.572(5) |
| Sr(1)-O(19)        | 2.559(5) | Sr(1)-O(13)        | 2.562(5) | Sr(1)-O(36)        | 2.610(5) |
| Sr(1)-O(10)        | 2.657(5) | Sr(1)-O(43)        | 2.664(5) | Sr(1)-O(15)        | 2.664(5) |
| Sr(1)-O(8)         | 2.679(5) | Sr(1)-O(41)        | 2.681(5) | Sr(1)-O(1)         | 2.881(5) |
| Zn(1)-O(48)#1      | 2.043(5) | Zn(1)-O(16)        | 2.077(5) | Zn(1)-O(26)#1      | 2.135(6) |
| Zn(1)-O(74)        | 2.123(5) | Zn(1)-O(35)        | 2.158(5) | Zn(1)-O(45)        | 2.206(5) |
| O(40)-Mo(1)-O(50)  | 105.0(3) | O(68)-Mo(2)-O(17)  | 105.2(3) | O(57)-Mo(3)-O(3)   | 101.0(2) |
| O(40)-Mo(1)-O(6)   | 101.4(2) | O(68)-Mo(2)-O(44)  | 105.0(3) | O(57)-Mo(3)-O(27)  | 101.2(2) |
| O(40)-Mo(1)-O(33)  | 99.5(2)  | O(68)-Mo(2)-O(6)   | 93.5(2)  | O(57)-Mo(3)-O(7)   | 100.9(2) |
| O(40)-Mo(1)-O(30)  | 97.2(2)  | O(68)-Mo(2)-O(52)  | 93.5(2)  | O(57)-Mo(3)-O(44)  | 91.8(2)  |
| O(40)-Mo(1)-O(21)  | 170.5(2) | O(68)-Mo(2)-O(21)  | 160.9(2) | O(57)-Mo(3)-O(20)  | 168.4(2) |
| O(71)-Mo(4)-O(39)  | 104.4(3) | O(70)-Mo(5)-O(32)  | 98.5(2)  | O(54)-Mo(6)-O(32)  | 100.1(2) |
| O(71)-Mo(4)-O(63)  | 102.3(2) | O(70)-Mo(5)-O(5)   | 101.8(2) | O(54)-Mo(6)-O(9)   | 100.2(2) |
| O(71)-Mo(4)-O(51)  | 99.3(2)  | O(70)-Mo(5)-O(37)  | 94.4(2)  | O(54)-Mo(6)-O(29)  | 97.0(2)  |
| O(71)-Mo(4)-O(23)  | 96.6(2)  | O(70)-Mo(5)-O(31)  | 95.3(2)  | O(54)-Mo(6)-O(25)  | 91.7(2)  |
| O(71)-Mo(4)-O(18)  | 170.2(2) | O(70)-Mo(5)-O(43)  | 172.9(2) | O(54)-Mo(6)-O(8)   | 172.8(2) |
| O(66)-Mo(7)-O(25)  | 104.4(3) | O(72)-Mo(8)-O(69)  | 103.7(3) | O(26)-Mo(9)-O(35)  | 103.4(2) |
| O(66)-Mo(7)-O(52)  | 101.2(2) | O(72)-Mo(8)-O(11)  | 104.7(2) | O(26)-Mo(9)-O(1)   | 100.9(2) |
| O(66)-Mo(7)-O(33)  | 98.3(2)  | O(72)-Mo(8)-O(51)  | 99.3(2)  | O(26)-Mo(9)-O(12)  | 92.9(2)  |
| O(66)-Mo(7)-O(64)  | 97.9(2)  | O(72)-Mo(8)-O(23)  | 86.9(2)  | O(26)-Mo(9)-O(19)  | 165.8(2) |
| O(66)-Mo(7)-O(21)  | 170.2(2) | O(72)-Mo(8)-O(60)  | 166.3(2) | O(26)-Mo(9)-O(13)  | 90.2(2)  |
| O(59)-Mo(10)-O(4)  | 100.1(2) | O(56)-Mo(11)-O(2)  | 100.2(2) | O(34)-Mo(12)-O(4)  | 99.0(2)  |
| O(59)-Mo(10)-O(46) | 100.3(2) | O(56)-Mo(11)-O(9)  | 100.4(2) | O(34)-Mo(12)-O(27) | 101.1(2) |
| O(59)-Mo(10)-O(39) | 92.9(2)  | O(56)-Mo(11)-O(7)  | 102.1(2) | O(34)-Mo(12)-O(50) | 93.1(2)  |
| O(59)-Mo(10)-O(14) | 96.4(2)  | O(56)-Mo(11)-O(17) | 92.9(2)  | O(34)-Mo(12)-O(28) | 94.7(2)  |
| O(59)-Mo(10)-O(15) | 172.8(2) | O(56)-Mo(11)-O(20) | 169.7(2) | O(34)-Mo(12)-O(41) | 172.1(2) |
| O(73)-Mo(13)-O(62) | 104.8(3) | O(61)-Mo(14)-O(37) | 104.2(3) | O(75)-Mo(15)-O(67) | 102.9(3) |
| O(73)-Mo(13)-O(24) | 104.4(3) | O(61)-Mo(14)-O(42) | 101.8(2) | O(75)-Mo(15)-O(12) | 104.4(2) |
| O(73)-Mo(13)-O(42) | 97.1(2)  | O(61)-Mo(14)-O(51) | 97.5(2)  | O(75)-Mo(15)-O(33) | 98.8(2)  |
| O(73)-Mo(13)-O(63) | 95.8(2)  | O(61)-Mo(14)-O(60) | 96.7(2)  | O(75)-Mo(15)-O(64) | 86.0(2)  |
| O(73)-Mo(13)-O(18) | 163.4(2) | O(61)-Mo(14)-O(18) | 169.8(2) | O(75)-Mo(15)-O(30) | 166.5(2) |
| O(47)-Mo(16)-O(55) | 103.7(3) | O(49)-Mo(17)-O(3)  | 101.8(2) | O(53)-Mo(18)-O(5)  | 101.8(3) |
| O(47)-Mo(16)-O(11) | 99.4(2)  | O(49)-Mo(17)-O(46) | 100.8(3) | O(53)-Mo(18)-O(2)  | 100.6(2) |
| O(47)-Mo(16)-O(1)  | 99.4(2)  | O(49)-Mo(17)-O(22) | 100.3(2) | O(53)-Mo(18)-O(22) | 100.0(2) |

|                       |            |                     |            |                     |           |
|-----------------------|------------|---------------------|------------|---------------------|-----------|
| O(47)-Mo(16)-O(10)    | 91.1(2)    | O(49)-Mo(17)-O(24)  | 91.2(2)    | O(53)-Mo(18)-O(62)  | 93.1(2)   |
| O(47)-Mo(16)-O(36)    | 168.4(2)   | O(49)-Mo(17)-O(58)  | 167.4(2)   | O(53)-Mo(18)-O(58)  | 169.0(2)  |
| O(41)-P(1)-O(8)       | 107.8(3)   | O(43)-P(2)-O(15)    | 108.3(3)   | O(48)-P(3)-O(13)    | 110.9(3)  |
| O(41)-P(1)-O(20)      | 110.6(3)   | O(43)-P(2)-O(58)    | 111.3(3)   | O(48)-P(3)-O(28)    | 109.1(3)  |
| O(41)-P(1)-O(21)      | 109.7(3)   | O(43)-P(2)-O(18)    | 109.3(3)   | O(48)-P(3)-O(30)    | 111.4(3)  |
| O(16)-P(4)-O(19)      | 110.4(3)   | O(31)-P(5)-O(10)    | 111.8(3)   | O(36)-P(6)-O(14)    | 111.0(3)  |
| O(16)-P(4)-O(29)      | 109.7(3)   | O(31)-P(5)-O(60)    | 111.9(3)   | O(36)-P(6)-O(38)    | 111.9(3)  |
| O(16)-P(4)-O(64)      | 109.7(3)   | O(31)-P(5)-O(65)    | 107.7(3)   | O(36)-P(6)-O(23)    | 108.7(3)  |
| O(19)-Sr(1)-O(13)     | 64.94(16)  | O(19)-Sr(1)-O(36)   | 115.81(15) | O(19)-Sr(1)-O(10)   | 79.13(15) |
| O(19)-Sr(1)-O(43)     | 118.74(16) | O(19)-Sr(1)-O(15)   | 170.92(15) | O(19)-Sr(1)-O(8)    | 72.92(15) |
| O(19)-Sr(1)-O(41)     | 101.80(15) | O(19)-Sr(1)-O(1)    | 58.04(15)  | O(48)#1-Zn(1)-O(16) | 175.9(2)  |
| O(48)#1-Zn(1)-O(26)#1 | 90.9(2)    | O(48)#1-Zn(1)-O(74) | 86.0(2)    | O(48)#1-Zn(1)-O(35) | 91.6(2)   |
| O(48)#1-Zn(1)-O(45)   | 97.82(19)  |                     |            |                     |           |

Symmetry transformations used to generate equivalent atoms: #1 -x,-y,-z; #2 -x+1/2,-y+1/2,-z

**Table S6** Selected Hydrogen Bond Lengths ( ) and Bond Angles (°) of complexes **1-5**

| D-H...A         | d(D-H) | d(H...A) | <D-H...A | d(D...A)  | Symmetry              |
|-----------------|--------|----------|----------|-----------|-----------------------|
| <b>1</b>        |        |          |          |           |                       |
| O13- H13B...O33 | 0.85   | 2.38     | 152.8    | 3.164(10) |                       |
| O13- H13B...O58 | 0.85   | 2.45     | 121.1    | 2.978(10) |                       |
| N7- H7A...O21   | 0.86   | 2.57     | 125.5    | 3.145(15) |                       |
| N10- H10A...O67 | 0.86   | 2.57     | 132.0    | 3.21(2)   |                       |
| N12-H12...O15   | 0.86   | 2.43     | 125.7    | 3.011(19) |                       |
| O3- H3C...O56   | 0.85   | 2.26     | 148.1    | 3.011(10) | [-x, y-1/2, -z+1/2]   |
| O3- H3C...O53   | 0.85   | 2.44     | 121.3    | 2.968(10) | [-x, y-1/2, -z+1/2]   |
| O3- H3C...O14   | 0.85   | 2.59     | 133.0    | 3.228(10) | [-x, y-1/2, -z+1/2]   |
| O13-H13C...O3W  | 0.85   | 2.39     | 122.7    | 2.941(12) | [x-1, y, z]           |
| N2-H2...O25     | 0.86   | 2.14     | 139.1    | 2.845(13) | [-x+1,y+1/2,-z+1/2]   |
| N5-H5...O74     | 0.86   | 1.94     | 168.4    | 2.786(11) | [-x+1, y+1/2, -z+1/2] |
| N7- H7A...O26   | 0.86   | 2.60     | 136.5    | 3.274(16) | [x, y-1, z]           |
| O3W-H3WB...O5   | 0.85   | 2.28     | 119.2    | 2.799(13) | [x+1, y, z]           |
| O1W-H1WA...N12  | 0.85   | 2.15     | 158.6    | 2.96(2)   | [x, -y+1/2, z+1/2]    |
| O1W-H1WB...O64  | 0.85   | 2.47     | 123.3    | 3.011(19) | [x,-y+1/2, z+1/2]     |
| O4W-H4WA...O2   | 0.85   | 2.07     | 123.1    | 2.636(12) | [x+1, y, z]           |
| O4W-H4WB...O5   | 0.85   | 2.58     | 127.1    | 3.169(12) | [-x+1, -y+1, -z]      |
| <b>2</b>        |        |          |          |           |                       |
| O35-H35A...O14  | 0.85   | 2.96     | 85.0     | 3.004(7)  |                       |
| O70-H70A...O10  | 0.85   | 2.50     | 155.5    | 3.297(8)  |                       |
| O70-H70A...O11  | 0.85   | 2.55     | 118.1    | 3.040(8)  |                       |
| N9-H9...O15     | 0.86   | 2.03     | 167.2    | 2.870(9)  |                       |
| O35-H35B...O44  | 0.85   | 2.36     | 146.8    | 3.105(7)  | [-x, y-1/2, -z+1/2]   |
| O35-H35B...O22  | 0.85   | 2.53     | 117.5    | 3.022(8)  | [-x, y-1/2, -z+1/2]   |
| O35-H35B...O1   | 0.85   | 2.58     | 141.3    | 3.282(8)  | [-x, y-1/2, -z+1/2]   |
| O70-H70B...O2W  | 0.85   | 2.55     | 115.4    | 3.012(11) | [x-1, y, z]           |
| N7-H7...O37     | 0.86   | 2.26     | 162.7    | 3.087(10) | [-x+1, y-1/2, -z+1/2] |
| N4-H4...O21     | 0.86   | 2.22     | 138.8    | 2.924(9)  | [-x+1, -y, -z+1]      |
| N1-H1...O5W     | 0.86   | 2.04     | 158.1    | 2.86(3)   | [x, y-1, z]           |
| N5-H5A...O4W    | 0.86   | 2.33     | 151.4    | 3.12(2)   | [-x+1, -y+1, -z+1]    |
| N5-H5A...O67    | 0.86   | 2.60     | 120.4    | 3.13(2)   | [-x+1, y+1/2, -z+1/2] |
| O1W-H1WA...O73  | 0.85   | 2.47     | 115.2    | 2.936(11) | [-x+1, -y+1, -z]      |

|          |                  |      |      |           |           |                         |
|----------|------------------|------|------|-----------|-----------|-------------------------|
|          | O1W-H1WB...O46   | 0.85 | 2.17 | 118.5     | 2.678(10) | [ x+1, y, z ]           |
|          | O4W-H4WA...O62   | 0.85 | 2.58 | 114.4     | 3.034(11) | [ x, -y+1/2, z+1/2 ]    |
|          | O4W-H4WB...N5    | 0.85 | 2.40 | 142.6     | 3.12(2)   | [ -x+1, -y+1, -z+1 ]    |
|          | O3W-H3WA...O56   | 0.85 | 2.90 | 85.8      | 2.964(11) | [ -x+1, y-1/2, -z+1/2 ] |
|          | O5W-H5WB...O26   | 0.85 | 2.53 | 171.0     | 3.37(3)   | [ x, -y+3/2, z+1/2 ]    |
|          | O2W-H2WA...O66   | 0.85 | 2.10 | 148.6     | 2.861(11) | [ x+1, y, z ]           |
|          | O2W-H2WB...O59   | 0.85 | 2.44 | 123.6     | 2.994(11) | [ -x+1, y-1/2, -z+1/2 ] |
| <b>3</b> | O47-H47A ...O55  | 0.85 | 2.73 | 89.6      | 2.857(8)  |                         |
|          | O75-H75A...O15   | 0.85 | 2.47 | 148.5     | 3.229(8)  |                         |
|          | N4-H4...O50      | 0.86 | 1.92 | 166.7     | 2.766(10) |                         |
|          | O4W-H4WA...O69   | 0.85 | 2.49 | 145.1     | 3.228(12) |                         |
|          | N8-H8A...O3W     | 0.86 | 1.88 | 161.9     | 2.71(2)   |                         |
|          | O3W-H3WB...O64   | 0.85 | 2.78 | 94.8      | 2.974(18) |                         |
|          | O5W-H5WA..O7W    | 0.85 | 1.83 | 130.3     | 2.47(3)   |                         |
|          | N10-H10A...O65   | 0.86 | 2.49 | 120.2     | 3.02(2)   |                         |
|          | O47-H47B...O70   | 0.85 | 2.34 | 129.3     | 2.955(8)  | [ -x, y+1/2, -z+1/2 ]   |
|          | O47-H47B...O60   | 0.85 | 2.36 | 133.4     | 3.006(8)  | [ -x, y+1/2, -z+1/2 ]   |
|          | O47-H47B...O1    | 0.85 | 2.38 | 151.5     | 3.149(8)) | [ -x, y+1/2, -z+1/2 ]   |
|          | O75-H75B... O45  | 0.85 | 2.97 | 86.3      | 3.040(8)  | [ -x, y+1/2, -z+1/2 ]   |
|          | O2W-H2WA...O57   | 0.85 | 2.04 | 140.6     | 2.755(10) | [ x+1, y, z ]           |
|          | O2W-H2WA...O48   | 0.85 | 2.34 | 111.5     | 2.768(10) | [ x+1, y, z ]           |
|          | O2W-H2WB...O67   | 0.85 | 2.39 | 115.3     | 2.862(10) | [ -x+1,y+1/2,-z+1/2 ]   |
|          | O1W-H1WA...O71   | 0.85 | 2.34 | 119.6     | 2.858(11) | [ -x+1, -y+1, -z ]      |
|          | O1W-H1WB...O68   | 0.85 | 2.24 | 106.0     | 2.609(10) | [ x+1, y, z ]           |
|          | N6-H6...O13      | 0.86 | 2.12 | 137.4     | 2.809(10) | [ -x+1,y-1/2, -z+1/2 ]  |
|          | N12-H12...O23    | 0.86 | 2.15 | 158.6     | 2.966(10) | [ x, y+1, z ]           |
|          | O6W-H6WB...O51   | 0.85 | 2.26 | 133.4     | 2.906(11) | [ x, -y+3/2, z+1/2 ]    |
|          | O4W-H4WA...O72   | 0.85 | 2.28 | 131.2     | 2.911(12) | [ -x+1,y-1/2, -z+1/2 ]  |
|          | O4W-H4WB...O5W   | 0.85 | 2.16 | 116.3     | 2.65(3)   | [ x, -y+1/2, z-1/2 ]    |
|          | N1-H1...O17      | 0.86 | 2.19 | 149.4     | 2.962(17) | [ -x+1, -y+1, -z+1 ]    |
|          | N1-H1...O40      | 0.86 | 2.33 | 136.2     | 3.014(16) | [ -x+1, -y+1, -z+1 ]    |
|          | O5W-H5WB...O3W   | 0.85 | 1.94 | 126.5     | 2.54(3)   | [ x, y, z+1 ]           |
|          | N10-H10A...O6W   | 0.86 | 2.21 | 149.0     | 2.98(2)   | [ x, -y+3/2, z-1/2 ]    |
| <b>4</b> | O75- H75A... O65 | 0.85 | 2.85 | 2.946(14) | 88.2      |                         |
|          | O76- H76A... O6  | 0.85 | 2.43 | 3.209(15) | 152.7 .   |                         |
|          | O75- H75B... O37 | 0.85 | 2.31 | 3.064(13) | 147.5     | [ -x+1, y+1/2, -z+1/2 ] |
|          | O75- H75B... O4  | 0.85 | 2.53 | 3.275(14) | 146.8     | [ -x+1, y+1/2, -z+1/2 ] |
|          | O75- H75B... O72 | 0.85 | 2.58 | 3.105(16) | 120.6     | [ -x+1, y+1/2, -z+1/2 ] |
|          | O1W- H1WB... O74 | 0.85 | 2.24 | 2.91(2)   | 134.9     | [ -x+1, -y+1, -z+1 ]    |
|          | O1W- H1WB... O72 | 0.85 | 2.43 | 2.91(2)   | 116.4     | [ x, y+1, z ]           |
|          | O3W- H3WA... O70 | 0.85 | 2.24 | 2.96(2)   | 143.1     | [ x, y+1, z ]           |
|          | O3W- H3WB... O66 | 0.85 | 2.77 | 3.01(3)   | 97.9      | [ -x, y+1/2, -z+1/2 ]   |
|          | O2W- H2WB... O39 | 0.85 | 2.50 | 3.026(19) | 121.2     | [ -x+1, -y+1, -z+1 ]    |
|          | O4W- H4WB... O73 | 0.85 | 2.52 | 2.85(4)   | 103.9     | [ x, -y+1/2, z-1/2 ]    |
|          | O4W- H4WB... O46 | 0.85 | 2.68 | 3.17(4)   | 118.3     | [ x, -y+1/2, z-1/2 ]    |

|   |                |      |      |       |           |                         |
|---|----------------|------|------|-------|-----------|-------------------------|
| 5 | O5W-H5WA...O73 | 0.85 | 2.92 | 92.2  | 3.071(18) |                         |
|   | O45-H45A...O35 | 0.85 | 2.82 | 90.0  | 2.946(7)  |                         |
|   | O74-H74A...O10 | 0.85 | 2.42 | 153.4 | 3.206(8)  |                         |
|   | O74-H74A...O19 | 0.85 | 2.44 | 120.4 | 2.967(8)  |                         |
|   | O74-H74B...O1W | 0.85 | 2.40 | 119.5 | 2.912(9)  |                         |
|   | N10-H10...O3W  | 0.86 | 2.37 | 144.0 | 3.106(17) |                         |
|   | O1W-H1WA...O65 | 0.85 | 2.56 | 96.9  | 2.796(9)  |                         |
|   | O7W-H7WA...O4W | 0.85 | 2.24 | 112.5 | 2.69(3)   | [ -x+1, -y+1, -z+1 ]    |
|   | O7W-H7WB...O5W | 0.85 | 2.22 | 106.7 | 2.60(3)   | [ -x+1, y+1/2, -z+1/2 ] |
|   | O6W-H6WA...O53 | 0.85 | 2.56 | 158.6 | 3.37(2)   | [ -x+1, y-1/2, -z+1/2 ] |
|   | O6W-H6WB...O3W | 0.85 | 2.28 | 105.4 | 2.64(2)   | [ -x+1, -y+1, -z+1 ]    |
|   | O45-H45B...O55 | 0.85 | 2.39 | 131.7 | 3.018(8)  | [ -x+1, y+1/2, -z+1/2 ] |
|   | O45-H45B...O36 | 0.85 | 2.39 | 134.6 | 3.051(7)  | [ -x+1, y+1/2, -z+1/2 ] |
|   | O45-H45B...O1  | 0.85 | 2.47 | 149.5 | 3.231(8)  | [ -x+1, y+1/2, -z+1/2 ] |
|   | O4W-H4WA...O53 | 0.85 | 2.33 | 132.2 | 2.966(11) | [ -x+2, y-1/2, -z+1/2 ] |
|   | O3W-H3WA...O42 | 0.85 | 2.49 | 118.5 | 2.987(11) | [ x, -y+3/2, z+1/2 ]    |
|   | O1W-H1WB...O72 | 0.85 | 2.91 | 103.7 | 3.214(9)  | [ -x+1, -y+1, -z ]      |
|   | O2W-H2WA...O69 | 0.85 | 2.15 | 151.2 | 2.925(10) | [ -x+1, -y+1, -z ]      |
|   | O2W-H2WB...O75 | 0.85 | 3.15 | 85.7  | 3.202(10) | [ -x+1, y-1/2, -z+1/2 ] |
|   | N1-H1...O22    | 0.86 | 1.96 | 167.4 | 2.808(9)  | [ x-1, y, z ]           |
|   | N4-H4...O28    | 0.86 | 2.20 | 161.5 | 3.029(10) | [ x, -y+1/2, z+1/2 ]    |
|   | N6-H6...O16    | 0.86 | 2.17 | 137.9 | 2.871(9)  | [ -x+1, y-1/2, -z+1/2 ] |
|   | N9-H9...O17    | 0.86 | 2.25 | 160.4 | 3.070(13) | [ -x+1, y-1/2, -z+1/2 ] |
|   | N10-H10...O61  | 0.86 | 2.45 | 126.3 | 3.041(16) | [ x, -y+3/2, z+1/2 ]    |
|   | O2W-H2WB...O66 | 0.85 | 2.48 | 118.6 | 2.985(11) | [ -x+1, y-1/2, -z ]     |
|   | O1W-H1WB...O67 | 0.85 | 2.12 | 168.1 | 2.961(12) | [ -x+1, y+1/2, -z ]     |

### 3. Physical characterization

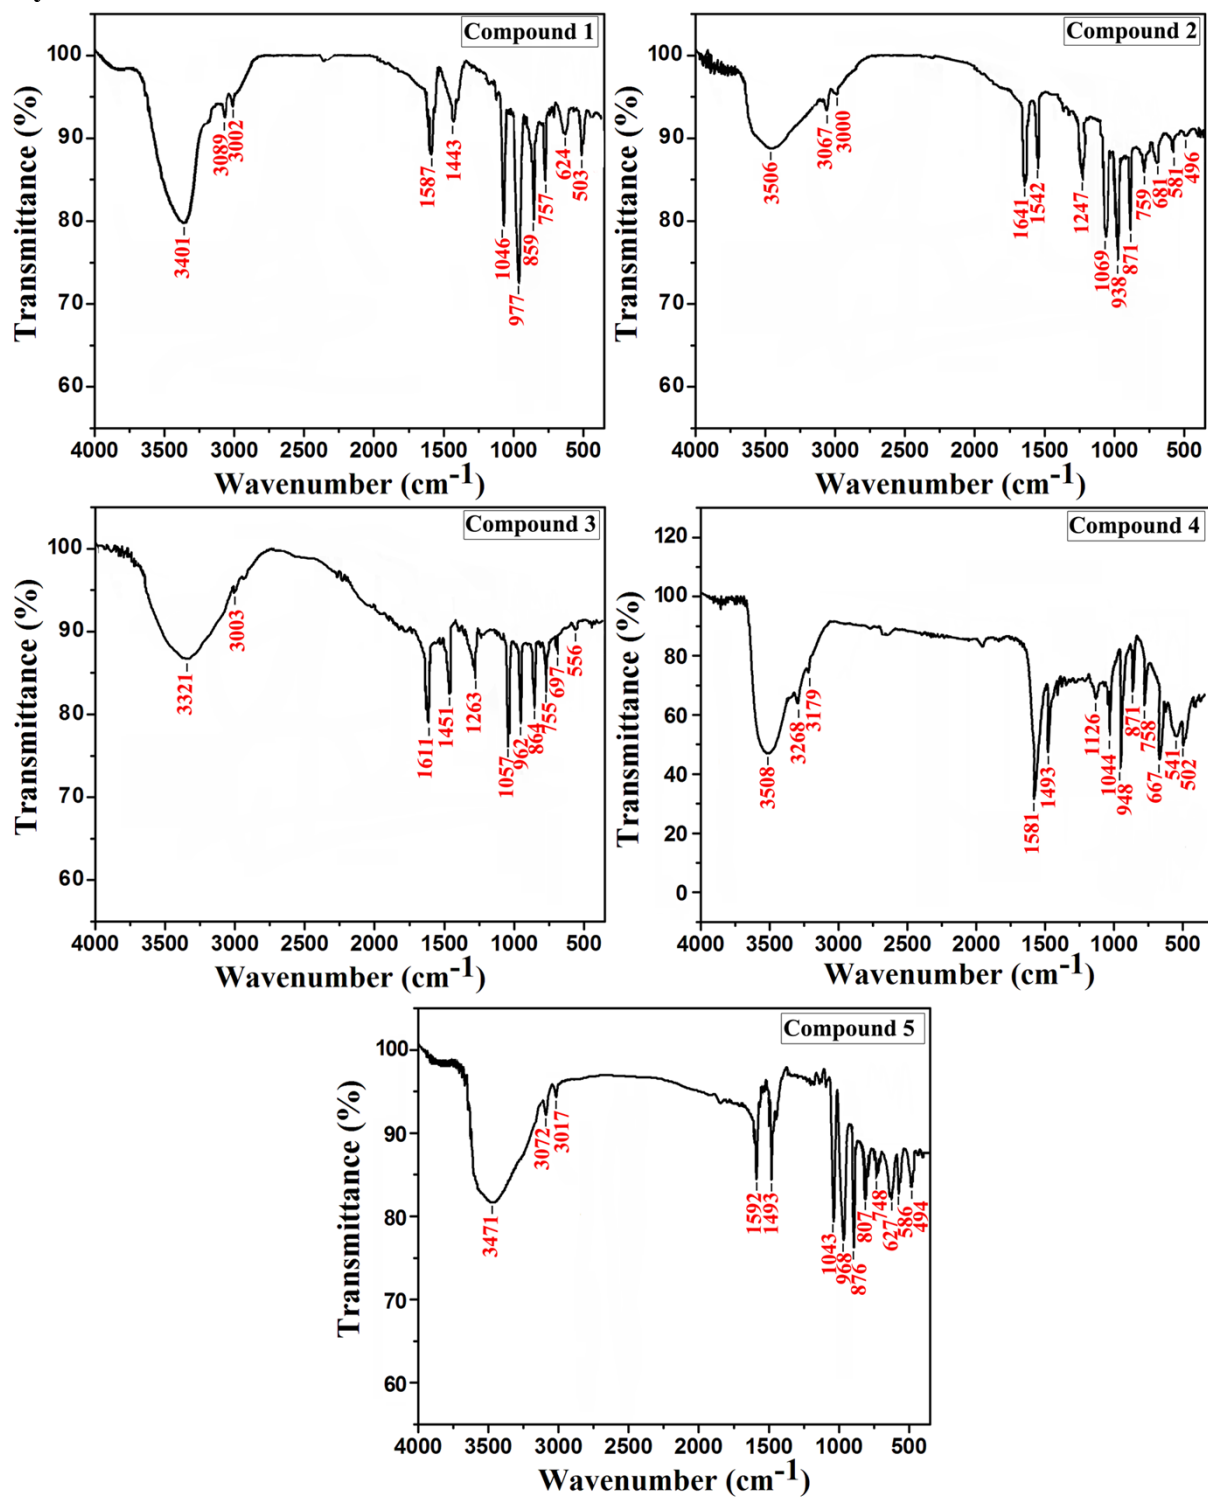

Fig. S6 IR spectra of compounds 1-5.

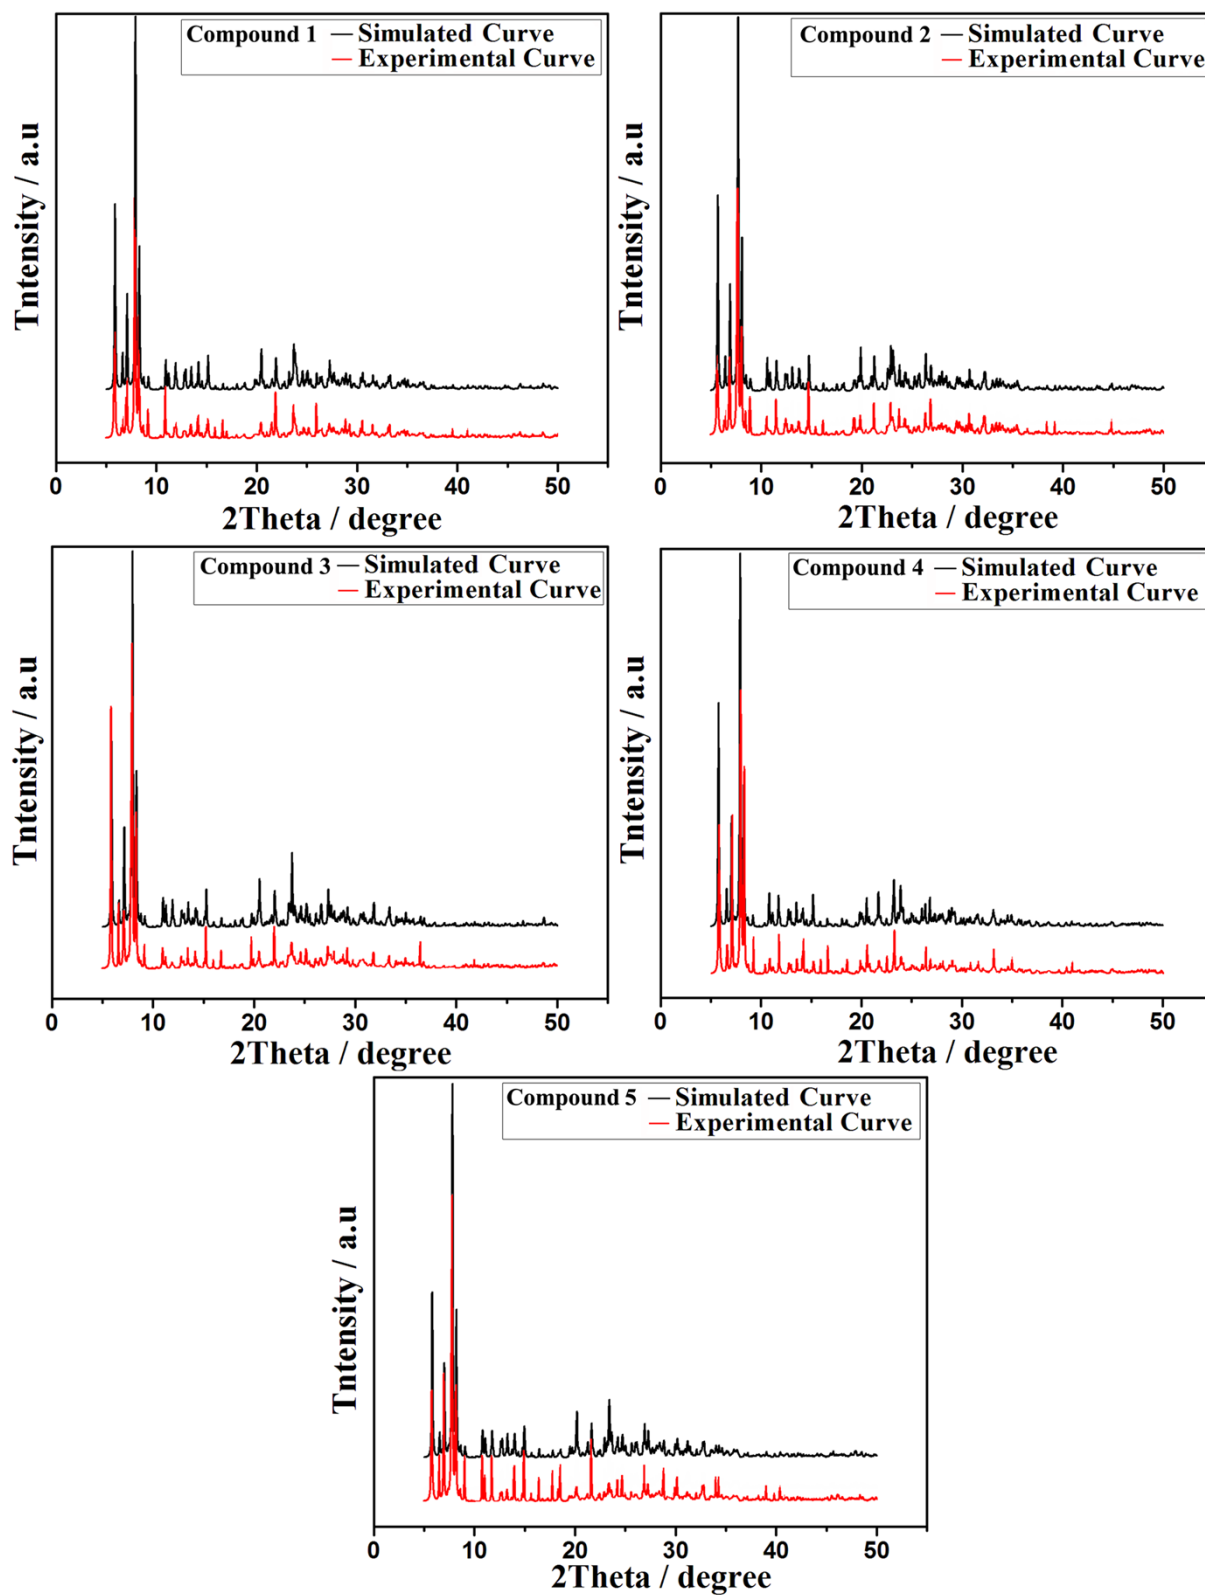

Fig. S7 The PXRD contrast curves of compounds 1-5.



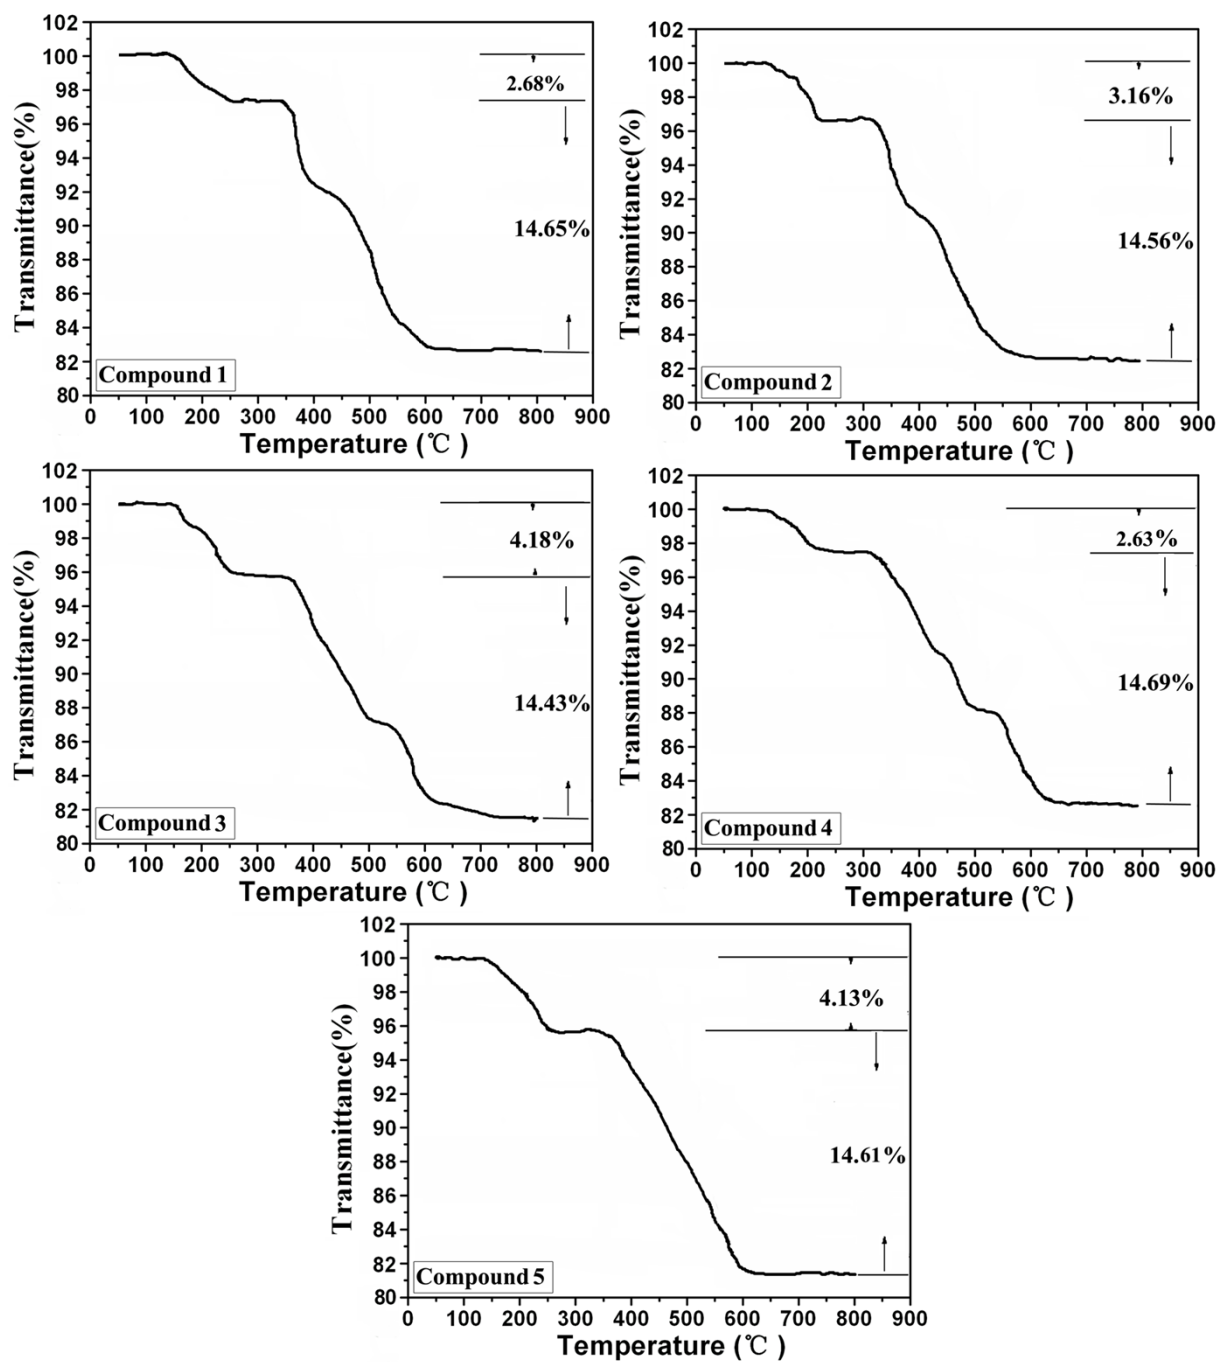

Fig. S8 TG curves of compounds 1-5.

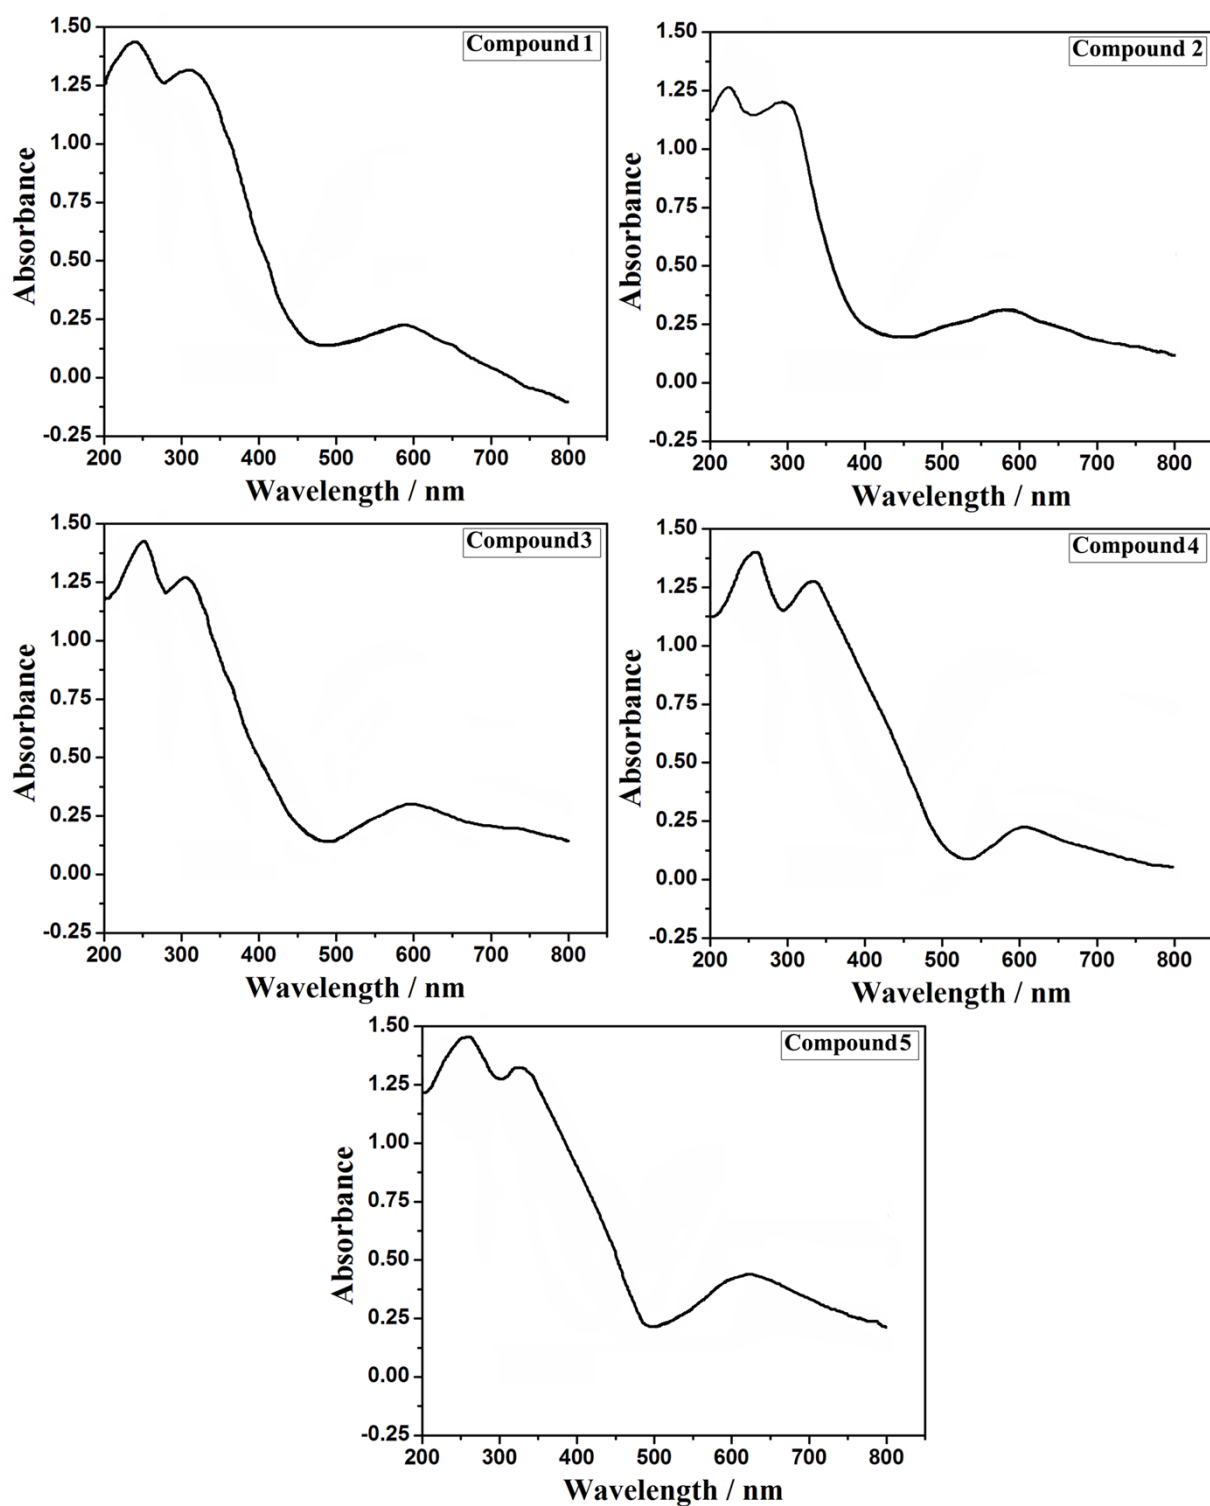

**Fig. S9** The UV-vis spectra of compounds 1-5 in solid state at room temperature.

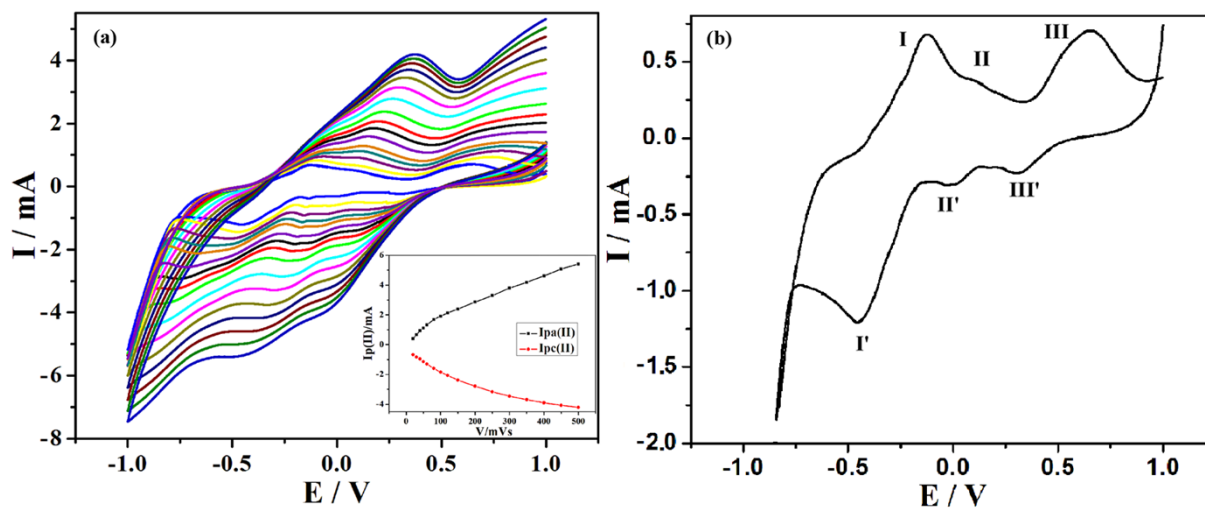

**Fig. S10 (a)** Cyclic voltammograms of **2-CPE** in the 1.0 M  $\text{H}_2\text{SO}_4$  solution at different scan rate. rates (from inner to outer: 20, 30, 40, 60, 80, 100, 120, 150, 200, 250, 300, 350, 400, 450, 500  $\text{mV s}^{-1}$ ; Insert plots: The dependence of anodic and cathodic peak II current on scan rates.) **(b)** Cyclic voltammograms of **2-CPE** in the 1.0 M  $\text{H}_2\text{SO}_4$  solution at at scan rate of 20  $\text{mV s}^{-1}$ ; Potentials vs. SCE.

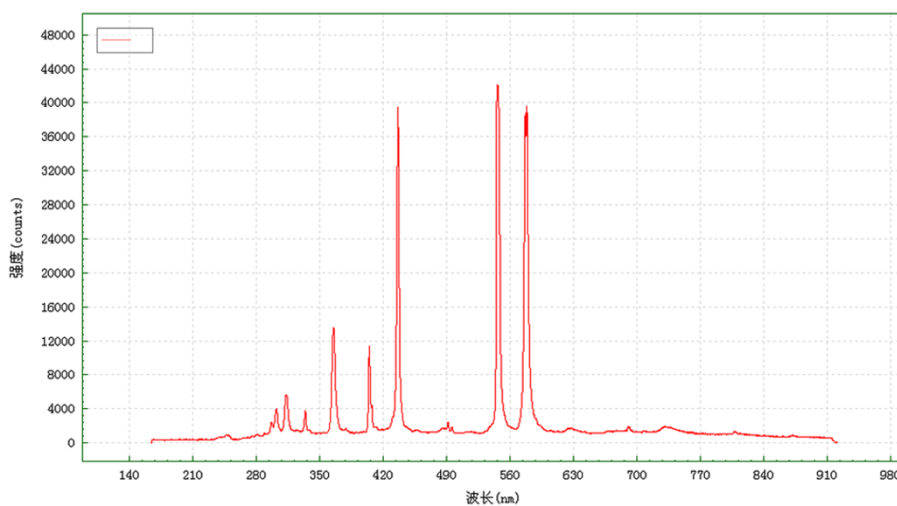

**Figure S11** The light spectrum of for the photocatalytic reaction

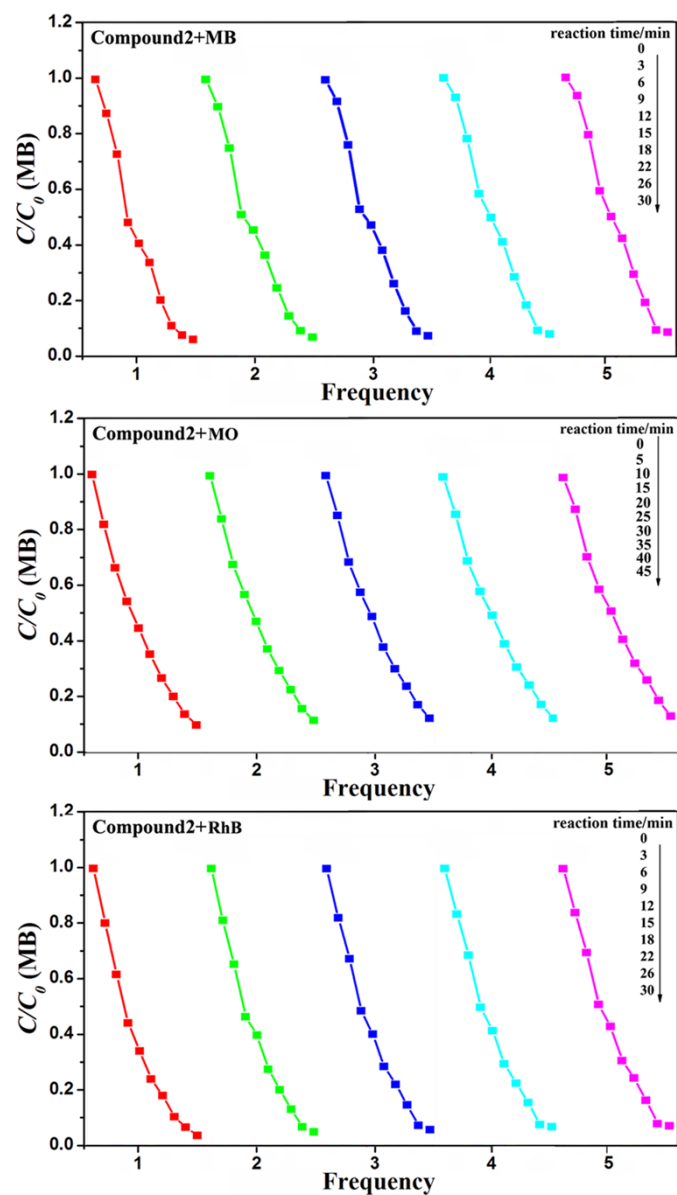

**Fig.S12** Changes of concentration for MB, MO, and RhB under different irradiation time in the presence of the compound **2** with repeating the reactions.

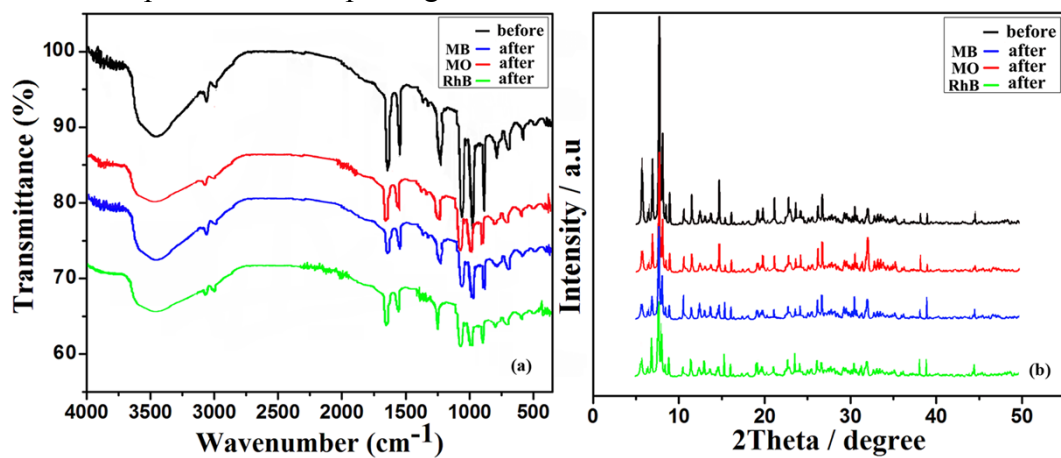

**Fig.S13** (a) The IR spectra of compound **2** before and after cycle reaction; (b) The XRD patterns of compound **2** before and after cycle five time.
